# Supplementary material for: Structural Effects of Protein Aging: Terminal Marking by Deamidation in Human Triosephosphate Isomerase
Source: PubMed Central journal article supplement (PMC4401446; doi:10.1371/journal.pone.0123379), 2015-04-17
Supplement: pone.0123379.s011.pdf [file pone.0123379.s011.pdf]

Progressive multiple sequence alignment of TIM sequences

```

                10      20      30      40      50      60      70      80      90     100
.....|.....|.....|.....|.....|.....|.....|.....|.....|.....|.....|.....|.....|.....|.....|.....|
Roseiflexus_castenholzii  -----MRTPLLAGNWKMYKTTEARELVEGLLHGL-GDVG-----D-RKVLVCPFFPTALQTVHDLVQG---
Chloroflexus_aurantiacus  -----MRIPLIAGNWKMYKTVGEATTLVRDLLAGL-GELS-----D-REAIVCPFFPTALAAVAALVAD---
Nostoc_punctiforme       -----MRKIVIAGNWKMFKTOAETOEFLOGFPLHL-EETP-----QGREVILCPPFTDL SVLSKTLHG---
Anabaena_variabilis      -----MRKIVIAGNWKMFKTOAESQEFLKEFLPAL-EETP-----QEREVLLCVPFPTDLA ILSQSLHG---
Synechocystis_sp         -----MRKIIIAGNWKMHKTQAEAQAFLOGFKPLI-EDAA-----ESREVVLCVPFPTDL SGM SQ LHG---
Cyanobacterium_aponinum  -----MRQIIIAGNWKMHKTQTESLEFLQGFSLHL-EDTP-----EERETVLCVPFPTCLN FMSKNLHG---
Crocospaera_watsonii     -----MAVGKIIIAGNWKMHKTQAEALEFLTVLKSKV-EETN-----ETREIVLCVPFPTALS ILSKSLHG---
Trichodesmium_erythraeum -----MRKTIIAGNWKMYKTQLEAKEFLEGLMSQL-TKTP-----EEREVVLCTPFPTALD FMSKILHG---
Synechococcus_sp         -----MRKVVIAGNWKMHKTQADASAFVQQLMPQL-ESVP-----EEREIVLCAPFPTTLGL LVDK LQS---
Prochlorococcus_marinus  -----MSKTVIAGNWKMHMTCAQARDFISAYLPLI-KNVP-----KGRELVLAPPFTAISTLSE I LKG---
Sphaerobacter_thermophilus -----MRKPIVAGNWKMNNTSLEEARALAGELRSTL-SAY-----STVERVLIPFPFWIVPLAD I LDG---
Anaerolinea_thermophila  -----MRKKFVAGNWKMNKTAEEARLLLNELIPAL-EPF-----SHVERAVCPPFPYLM MVRHMLEG---
Myxococcus_xanthus      -----MATARRRKIVAGNWKMNKSVPEALALVRLRGQV-ASLG-----DTVEVVVAPPFVAL QPLHVALEG---
Collinsella_tanakaei    -----MTQNNRLLIAGNWKMNNDVQAATLADELVAALDGVDN-----G-VEVLVCPPTIDLT TVA AK LDG---
Atopobium_vaginae       -----MRNTMIAGNWKMNKTYGEAAELAQLVRELPGSTG-----N-VDVVVCPTIDLKAVAATLE QSD---
Eggerthella_sp          -----MRKPMAGNWKMNNTVAEAVVLTQELSNRYTDAWA-----DRADVVICPPFVDLKP AKTVLEFDK---
Dictyoglomus_thermophilum -----MRRKIIAANWKMYKTCAETESFIKEFIELSKGY-----EEKEIVICPPFPTS L YVASKLLKDTA---
Aquifex_aeolicus        -----MRR-LIAANWKMNKTVKETEEYINTFLKFEVHP-----ESREILICPPFPTS L YVAGKMLQGTG---
Thermodesulfovibrio_yellowston -----MPKKFIVANWKMHKTVREALAFLDEFIPITKGL-----NGREIGIAPTFFICIESVGKVLINTS---
Dehalogenimonas_lykanthroporep -----MSERP TVIAGNWKMHHTTVDEAVELV GEMSSALAEF-----ENVEVII CPPFIALCKVKELLGQANR---
Dehalococcoides_sp     -----MRQIIIAGNWKMNNTLSEACTLVQSMKCELERI-----EGIEKII CPPFISLYPIKTI L ENSS---
Geobacter_metallireducens -----MRTPIIAGNWKLFKKSSEAQDFVAELIPLVQKT-----TDVEI VIAPFTT L SVL SAVKRAIADCN---
Desulfobacter_postgatei -----MTRIPLIAGNWKMYKTGTQAVAAKQLAHL SKGV-----DGDVIMIAVPFTT L SVL A AAL GKSSP---
Planctomyces_brasiliensis -----MRRYLIAGNWKMNLTPEGALYAAELAKAVQK GK-----PDAKVMIA PAFVA I PAVLEAVKGS---
Spirochaeta_coccoides  -----MRRYIAGNWKMNLTPEGALYAAELAKAVQK GK-----PDAKVMIA PAFVA I PAVLEAVKGS---
Denitrovibrio_acetiphilus -----MRKPYIYGNWKMNLDMHGSSDLISSILS-VKIDY-----TKVDVG VAPDFSSSLYKVSQTIKQMG---
Prosthecochloris_aestuarii -----MRKKIVVGNWKMNK TIAEAVELSSAIDQLGEVS-----ASCEVGIAPAFPALSGVHG VISGT---
Chlorobium_phaeobacteroides -----MRKKIVVGNWKMKNVAEGVALASSILENLDG GK-----MACEVGIAPAYPVLSEVGRVIEGS---
Chlorobium_ferrooxidans -----MRQKIVVGNWKMNNTIAESSALASELVAALGKGF-----SGCEVGIAPTYVALQ EAGKIIAGS---
Chloroherpeton_thalassium -----MRKKFVAGNWKMNKDLLGAVSLATEILQLL GDEA-----PTCEVAIAPTFLCQQAVFQVIDES---
Treponema_pallidum      -----MRGYFIAGNWKMHKTCAEAVALAQELVREL RGG-----PHTYMIAPSFTALD AVGKVL RGS---
Leptospira_interrogans  -----MRKTIIAGNWKMNLSLKEAVFLAHSIREKIP SIS-----KDKVSMVFPSTLHLENVSKILEGS---
Borrelia_turicatae     -----MRKIFLAGNWKMHYTSMEAGVAKQIVDGVKNIK-----DDVVVMITPPFPTSLCKVCEVTRGS---
Thermotoga_maritima     -----ITRKLILAGNWKMHKTI SEAKKFVSLLVN E LHDV-----KEFEIVVCPFFPTALS EVGEILSGR---
Fusobacterium_nucleatum -----MRRLLVIAGNWKMYKNNKEAVE TL TQLKDLTRDV-----KNVDIVIGAPFTCLSDAVKIVEGS---
Selenomonas_sputigena  -----MARRPIIAGNWKMNNTIAEGVALVKELMPLVKDA-----KDVDV VACPTATALAAVAEAVKGS---
Ruminococcus_sp        -----MARKKIIAGNWKMNMTPEAVKLVETLKLPLV V N-----DEV DVVFCVPAIDIIPVVEATKGT---
Clostridium_botulinum   -----MRTAIIAGNWKMNKTVKEAVELVKELKPLVKD-----AKCDVVV CPTYVCLPAVLEEVKGS---
Clostridium_perfringens -----MRTPIIAGNWKMHYTIDEAVKLV EELKPLVKD-----AKCEVVV CPTFVCLDAVKKAVEGT---
Thermoanaerobacter_wiegeli -----MISKGVFVLRPIIAGNWKMHMTPEAVKLV EELI PQVKD-----AKAEVVV I PPFVDL TEVNKVIQGT---

```

|                                |                                                         |                             |
|--------------------------------|---------------------------------------------------------|-----------------------------|
| Brachyspira_murdochii          | -----MARRKLIAGNWKMNNSNKEALELVNQLKNLVKDV-----            | KDRDIMIAPTFTCLSDVHNAVKGS--  |
| Acholeplasma_laidlawii         | -----MAKRIPVIAANWKMFKTKDEALEFIFAVNAAVPSRD-----          | EVESITCAPAILLNLLVKEGE---    |
| Lactobacillus_reuteri          | -----MRKPFIAANWKMHKNVQESVEFVDAIKGKLPDPQ-----            | EVEVGIAAQAFALPSMVQAADD--    |
| Bacillus_subtilis              | -----MRKPIIAGNWKMNKTLGEAVSFVEEVKSSIPAAD-----            | KAHAVVCPALFLEKLASAVKGG--    |
| Bacillus_thuringiensis         | -----MRKPIIAGNWKMNKTLAEAVSFVEEVKSSIPAAAS-----           | AVDAVVCSPALFLERLVAATEG---   |
| Listeria_monocytogenes         | -----MRKPIIAGNWKMNKTAAGQFAEDVKNNVPSDD-----              | AVESVVAAPALFLQELVRLTEG---   |
| Geobacillus_stearothermophilus | -----MRKPIIAGNWKMHKTLAEAVQFVEDVKGHVPPAD-----            | EVISVVCAPFLFLDRLVQAADG---   |
| Staphylococcus_aureus          | -----MRTPIIAGNWKMNKTVQEAQDFVNALP-TLPDSK-----            | EVESVICAPAIQLDALTTAVKEGKA   |
| Enterococcus_faecalis          | -----MRKPIIAGNWKMNKTLSEAQSFAEAVKNAVPSND-----            | VVDAVIGSPALFLAPLAWNLDK---   |
| Lactococcus_lactis             | -----MSRKPIIAGNWKMNKTLSEAQAFVEAVKNNLPSSD-----           | NVESVIGAPALFLAPMAYLRQG---   |
| Streptococcus_pneumoniae       | -----MSRKPFIAGNWKMNKNPEEAKAFVEAVVSKLPSSD-----           | LVEAGIAAPALDLTTVLAVAKG---   |
| Erysipelotrichaceae_bacterium  | -----MRKPIIVGNWKMNKTMKETKEFMEAVDAAAASEN-----            | AVFG-IGAPYTALSAAVAGAKN---   |
| Lentisphaera_araneosa          | -----MKRRLFIAGNWKLNKTAAEETETVADLKAKLADFNG-----          | SLDVALFPPFLSIAAGQAAAAG---   |
| Chlamydomphila_pneumoniae      | -----MTRQSYVLGNWKMHKTIQEAKEVYQTLASLLQG-EP-----          | LSCTIGIASPFTSLRAIHEMINTTG-  |
| Desulfovibrio_vulgaris         | -----MKKLIANWKMKYTIDEARATGRELVSAVAGSLP-----             | ADREVLVCPFFTALHALHDTFFKDVE- |
| Mesorhizobium_opportunistum    | -----MVYVWGTSWKMNKTLAEAMDFAAILAGFVPG-FD-----            | DRIQPFVIPPFTAVRQVKQALSSTR-  |
| Bartonella_henselae            | -----MSPNIRPFIAGNWKMNGTGES-LGELRAIAAGISSDLGRL-----      | FEALICVPATLLSRAFDILGGEN-    |
| Brucella_abortus               | -----MTPGIRPLVAGNWKMNKGES-LTELRAIAAGLSSDLGRK-----       | LDAVICVPATLLSRAAETLEGET-    |
| Rhizobium_etli                 | -----MTPDVRPLVAGNWKMNNGTRAS-LDQIKAIAGEVRPPLADK-----     | VEALICPPATLLYVATALCTDSP-    |
| Agrobacterium_tumefaciens      | -----MTPNVRPLVAGNWKMNNGTRAS-LDQIKAMAEGVKGALSEK-----     | VDALICPPSTLLYVATALCDDSP-    |
| Rhodobacter_sphaeroides        | -----MRKLAAGNWKMNNGTEAD-LGEIDALLA---AHPAPR-----         | CEMLICPPATLVARMAGR-AAQG-    |
| Ruegeria_sp                    | -----MARKLAAGNWKMNNGTGEH-LAELENLAQ---GDLPEG-----        | VDVLICPPATLIAAFAADKARGKK-   |
| Bradyrhizobium_japonicum       | -----MTDAIRPLIAGNWKMNGLKAA-SSEFDAMLEGA-TELSSG-----      | IDLLVCPATLIAAFAADRLAANEK    |
| Rhodopseudomonas_palustris     | -----MPVPAVRSIAGNWKMNGLKAA-SSEFDAMLEGA-TELSSG-----      | IDLLVCPATLIAAFAADRLAANEK    |
| Methylobacterium_radiotolerans | -----MTQSGRRPLVAGNWKMNNGTRSS-IQVVEAIRDGLSPDLASR-----    | IDVLICPPATLIGSCVAAAAGSP-    |
| Rhodospirillum_rubrum          | -----MTVRRPLIAGNWKMNGLKAEQGLARDLAQRLNKAGGVD-----        | FDLLCPPFPPLISTVVAVAGSG-     |
| Zymomonas_mobilis              | -----MTIRKLIAGNWKMNGLKAEQGLARDLAQRLNKAGGVD-----         | FDLLCPPFPPLISTVVAVAGSG-     |
| Gluconacetobacter_hansenii     | -----MKQIIVGNWKMHGMDAATAKAADDIGAAMGADVSG-----           | AQVVICPPFTQLALLGPKLREHG-    |
| Thermus_thermophilus           | -----MRRVLVAGNWKMHKTPSEARVWFELKRLPPLQS-----             | EAVLPAFPILPVAKEVLAE---      |
| Thermus_aquaticus              | -----MRRVLVAGNWKMHKVPSEARVWLAELKRLPPLDS-----            | EAVLPAFPMLPVAKEVLSG---      |
| Oceanithermus_profundus        | -----MRTPLLAGNWKMHKTPSEARVWFELKRLPPLDS-----             | EAVLPAFPMLPVAKEVLSG---      |
| Deinococcus_deserti            | -----MPNNLLALNWKMNKTPSEAQAWEAELSSALSPGEA-----           | ELAVMAPAIMLPALAAGLP---      |
| Bifidobacterium_bifidum        | -----MAS-RIPLLGNWKMNLDHLEATYFVQKLVWLLRDAREDY-----       | SRCEIALMPSFTSLRSVQVLVEADK-  |
| Bifidobacterium_longum         | -----MASKRIPLVAGNWKMNFDHLEATYFVQKLVWLLRDAREDY-----      | KRCEVALFPSTSLRSVQVLVEADK-   |
| Gardnerella_vaginalis          | -----MVVNRKPLVAGNWKMNFNHLEATHFIQKFWRLCDSHFDC-----       | KKCDIALMPSFTSLRSVQVLVEADK-  |
| Nocardia_farcinica             | -----MARKPLIAGNWKMNLDHLEATYFVQKLVWLLRDAREDY-----        | KRCEVALFPSTSLRSVQVLVEADK-   |
| Mycobacterium_tuberculosis     | -----MSRKPLIAGNWKMNLDHLEATYFVQKLVWLLRDAREDY-----        | KRCEVALFPSTSLRSVQVLVEADK-   |
| Corynebacterium_glutamicum     | -----MARKPLIAGNWKMNLDHQAIGTVOKLAFALPKEYFE-----          | KVDVAVTVPFTDIRSVQTLVEGDK-   |
| Propionibacterium_acnes        | -----MSRTPMAGNWKMNLDHVAATSLVQDLGEMALKAAGYDS-----        | SKSEAVVIPPFTDIRPVAVIIDDGK-  |
| Actinomyces_odontolyticus      | -----MAGNWKMNLDHLEANHLVQGLAMALSDAGHDY-----              | SKCEVLVIPPFTDIRVQTLVDADE-   |
| Microbacterium_testaceum       | -----MGVTRTPLIAGNWKMNLDHLEAVVQKLVWLLRDAREDY-----        | KRCEVALFPSTSLRSVQVLVEADK-   |
| Moritella_marina               | -----MRHPVVMGNWKLNGSKEM-----VVDLLNGLNAELEG-----         | VTGVDVAVAPPALFVDLAERTLTEA-- |
| Photobacterium_profundum       | -----MRHPVVMGNWKLNGSKEM-----VVDLLNGLNAELEG-----         | VTGVDVAVAPPALFVDLAERTLTEA-- |
| Vibrio_cholerae                | -----MIRYGDIPMRRPVVMGNWKLNGSKAM-----VTDLLNGLNAELEG----- | VEGVDVVVAPPAMYDLAERLIKEG--  |
| Shigella_flexneri              | -----MRHPLVMGNWKLNGSRHM-----VHELVSNLRKELAG-----         | VAGCAVAIAPPEMYIDMAKREAEG--  |
| Escherichia_coli               | -----MRHPLVMGNWKLNGSRHM-----VHELVSNLRKELAG-----         | VAGCAVAIAPPEMYIDMAKREAEG--  |

|                                |                                                                                     |
|--------------------------------|-------------------------------------------------------------------------------------|
| Salmonella_enterica            | -----MRHPLVMGNWKLNGSRHM-----VNELVANLRKELTG--VAGCDVAIAPPEMYIDLAKRAAAG---             |
| Klebsiella_pneumoniae          | -----MRHPLVMGNWKLNGSRHM-----VNELVANLRTELAG--VSGCAVAIAPPEMYIDLAKRAAEG---             |
| Enterobacter_aerogenes         | -----MRHPLVMGNWKLNGSRHM-----VNELVANLRTELAG--VSGCAVAIAPPEMYIDLAKRAAEG---             |
| Serratia_symbiotica            | -----MRHPLVMGNWKLNGSRHM-----VSELIAGLRNALSRL--VDGCGVAIAPPVYLDQARHALAG---             |
| Yersinia_pestis                | -----MRHPLVMGNWKLNGSTHM-----VNELIAGLRKELST--VDGCGVAIAPPVYLDQAKHELAG---              |
| Actinobacillus_pleuropneumonia | -----MARRPLVMGNWKLNGSKAF-----TKELIAGLKAELAD--VKGCDVAIAPPVYLAEEAALAGQ---             |
| Pseudomonas_aeruginosa         | -----MRRPLVAGNWKMHGTHSS-----VAELIKGLR-QLAL--PSGVDVAVMPPCLFISQVIQGLAG---             |
| Marinomonas_posidonica         | -----MIRQKIVAGNWKMNKSKAS-----ISSLVNGLLEMSE-----SSAEVVTTPFPYLSQVADVIAQQ---           |
| Xylella_fastidiosa             | -----MRPKIVAGNWKLHGSHAF-----AQALVAQVAAGLP--LLGVSVIILPPLLYLSDLAQRFKG---              |
| Xanthomonas_campestris         | -----MRRKIVAGNWKLHGTRAF-----ATELVAQVAHMP--LAGVDVVILPPLPYLGLDIEDFEA---               |
| Marinobacter_algicola          | -----MRRKIVAGNWKMNKSKGL-----VSNLVGQVRSELASF--DNGVEAVIIPPALFVDDVVEQA-G---            |
| Aeromonas_caviae               | -----MGHRKPFVAANWKLHGSRSQ-----LEQFTSQCAERI-----DEDVDVVLCPSPVHLGFTAELLGEOG---        |
| Pseudoalteromonas_haloplanktis | -----MAARKAMVAGNWKMNKSLLEL-----VKQMSDAINNPK-----SNEIDIVLFP---PFPLVSAMIASG---        |
| Legionella_pneumophila         | -----MRQKIVAGNWKMNKQIQQ-----VTELVSQIEELIGF--DCAAQVAVMPPSIYIPKVRDCLRTG---            |
| Ralstonia_solanacearum         | -----MS--ARPKLVVGNWKLHGSLNG-----NAELLEKIKAAAG-----QARAALAVCAPFPYLAQCQSLLAGS---      |
| Burkholderia_sp                | -----MSNQORAKLVVGNWKMHGRLAA-----NAALLQAVVQGANEL--PADVVRVGVCPVPSLYLAQTQSLLLEGT---    |
| Bordetella_pertussis           | -----MTTAENRARLVLGNWKMHGRLAE-----NAALLAEELRAAD--A-AAHCCEMGVCPFPYLAQTAAALQGS---      |
| Nitrosococcus_watsonii         | -----MRTSLVVGNWKMNGSRAA-----NRALLESMRKEM-EA-GVVAEVAVCPPFPYLAQDMESSLQGS---           |
| Coxiella_burnetii              | -----MQRRPLVAGNWKMHGSRES-----VGQLLRALKHGC-ER-LETAELAVFPFPVFLQOCEEALMRT---           |
| Variovorax_paradoxus           | -----MVT'TTNNAM'TKKKLIAGNWKMNKGLAV-----NEALVKALQQGLAAS--PAACDVALCAPYFAQLQSLLAGTP--- |
| Halomonas_elongata             | -----MPTPLIAGNWKMNKSLDL-----IESFGRALADAE--L-PSRLEVALMVPFPYLEAASRALTGS---            |
| Tenebrio_Molitor               | -----MARKFVVGGNWKMNKDKQINEIIG--FLKSGPLNDP-----TEVVVGVPAIYLSYVKTICVP---              |
| Bombyx_mori                    | -----MGRKFFVGGNWKMNKDKQINEIVN--NLKKGPLDPN-----VEVIVGVPAIYLSYVKTIIIP---              |
| Apis_mellifera                 | -----MGRKFFVGGNWKMNKDKSEINDIVG--FLKKGPLDSN-----VEVVVGVPSIYLYTYAKNILP---             |
| Aedes_aegypti                  | -----MGRKFCVGGNWKMNKDKASITDLCK--TLTTGPLSAD-----TEVIVGCPAPYLTILARSQLP---             |
| Anopheles_gambiae              | -----MGRKFCVGGNWKMNKDKASITELCK--TLSAGPLDPN-----TEVVVGVCPAPYLSLARSLLP---             |
| Drosophila_melanogaster        | -----MSRKFVGGNWKMNKDKQSIKAEIAK--TLSSAALDPN-----TEVVIGCPAIYLMYARNLLP---              |
| Rhipicephalus_microplus        | -----MAARRFCVGGNWKMHGSKNSIRDICN--TLKGASLDPN-----VEVIVACAPAYLDYCRSLLP---             |
| Ixodes_scapularis              | -----MSGRKFVGGNWKMNKDKSISKEICD--MLKTAKLDPN-----TEVVVLGCPAPYLDYVRRILP---             |
| Anolis_carolinensis            | -----MAP--RKFFVGGNWKMNKDKKSLGELIQ--TLNGAKVSGD-----VEVVCGAPTIIYLDIFARQKLD---         |
| Gallus_gallus                  | -----MAP--RKFFVGGNWKMNKDKKSLGELIH--TLNGAKLSAD-----TEVVCGAPSIYLDIFARQKLD---          |
| Orcinus_orca                   | -----MAPSRKFFVGGNWKMNKGRKNNLGEELIN--TLNAAKVPAD-----TEVVCAAPTAYIDIFARQKLD---         |
| Bos_taurus                     | -----MAPSRKFFVGGNWKMNKGRKNNLGEELIN--TLNAAKVPAD-----TEVVCAAPTAYIDIFARQKLD---         |
| Canis_lupusfamiliaris          | -----MAPSRKFFVGGNWKMNKGRKNNLGEELIT--TLNAAKVPAD-----TEVVCAAPTAYIDIFARQKLD---         |
| Odobenus_rosmarus              | -----MAPSRKFFVGGNWKMNKGRKNNLGEELIT--TLNAAKVPAD-----TEVVCAAPTAYIDIFARQKLD---         |
| Oryctolagus_cuniculus          | -----APSRKFFVGGNWKMNKGRKNNLGEELIT--TLNAAKVPAD-----TEVVCAAPTAYIDIFARQKLD---          |
| Nomascus_leucogenys            | -----MAPSRKFFVGGNWKMNKGRKQSLGELIG--TLNAAKVPAD-----TEVVCAAPTAYIDIFARQKLD---          |
| Pan_troglodytes                | -----MAPSRKFFVGGNWKMNKGRKQSLGELIG--TLNAAKVPAD-----TEVVCAAPTAYIDIFARQKLD---          |
| Homo_sapiens                   | -----MAPSRKFFVGGNWKMNKGRKQSLGELIG--TLNAAKVPAD-----TEVVCAAPTAYIDIFARQKLD---          |
| Pongo_abelii                   | -----MAPSRKFFVGGNWKMNKGRKQSLGELIG--TLNAAKVPAD-----TEVVCAAPTAYIDIFARQKLD---          |
| Macaca_mulatta                 | -----MAPSRKFFVGGNWKMNKGRKQNLGELIG--TLNAAKVPAD-----TEVVCAAPTAYIDIFARQKLD---          |
| Ochotona_princeps              | -----APSRKFFVGGNWKMNKGRKNNLGEELIT--TLNAAKVPAD-----TEVVCAAPTAYIDIFARQKLD---          |
| Sus_scrofa                     | -----MAPARKFFVGGNWKMNKGRKNNLGEELIN--TLNAAKLPAD-----TEVVCAAPTAYIDIFARQKLD---         |
| Mus_musculus                   | -----MAPTRKFFVGGNWKMNKGRKCLGELIC--TLNAAKVPAG-----TEVVCAAPTAYIDIFARQKLD---           |
| Rattus_norvegicus              | -----MAPSRKFFVGGNWKMNKGRKCLGELIC--TLNAAKLPAD-----TEVVCAAPTAYIDIFARQKLD---           |
| Xenopus_laevis                 | -----MSPRKFFVGGNWKMNKDKKSLGELIN--TLNSGKMNAD-----TEVVCGAPAIYLDIFARQKLD---            |

Xenopus\_tropicalis -----MSSRKFVGGNWKMGDKKSLTELIN-TLNSGKISAD-----TEVVCGAPTIYLD FARQKLD----  
Danio\_erio -----MSGRKFVGGNWKMGDKKSI EELAN-TLNSAKLNPD-----TEVVCGAPTIYLDYARSKLN----  
Ictalurus\_punctatus -----MTARKFFVGGNWKMGDKKSLGELIN-TLNGAKLNAD-----TDVVCGAPSIYLD FARSKLD----  
Oreochromis\_niloticus -----MT-RKFFVGGNWKMGDKKSLGELIQ-TMNGAKVDPN-----VEVVCGAPSIYLD FVRSKLD----  
Nematostella\_vectensis -----MG--RKFFVGGNWKMGSLVQIDGILK-NLHDSLSLSD-----TEIVVSPPALYLSYVRKAAK----  
Schistosoma\_mansoni -----MSGSRKFVGGNWKMGSRDDNDKLLK-LLSEAHFDDN-----TEVLIAPPSVFLHEIRKSLK----  
Strongylocentrotus\_purpuratus -----MASGRRFVGGNYKMGSKASIDGLLK-MLEESQIPGN-----TDVVVAPPVYLDYMNSKIP----  
Caenorhabditis\_elegans -----MTRKFFVGGNWKMGDYASVDGIVT-FLNASADNSS-----VDVVVAPPAPYLAYAKSKLK----  
Caenorhabditis\_remanei -----MTRKFFVGGNWKMGDFASVDGIVT-FLNQSADNAS-----VDVVVAPPAPYLAYAKSHLK----  
Brugia\_malayi -----MSRKFVGGNWKMGNKASVDNIK-FLNDGAVVPN-----VDVVVAPPAPYLSYVKEKVK----  
Trichinella\_spiralis -----MSSRKFVGGNWKMGDSKSI E EYIK-LLNDNTLPGN-----VEIVIAPPFVYLERIRKQLK----  
Ricinus\_communis -----MARKFFVGGNWKCGTSEEVKIVS-TLNEGHVPSD-----VVEVVISPPFVFLPLVKDSLK----  
Vitis\_vinifera -----MGRKFFVGGNWKCGTGEEVKIVS-TLNAGEVPSGD-----VVEVVVSPFVFLPLVKSTLR----  
Arabidopsis\_thaliana -----MARKFFVGGNWKCGTAEVVKIVN-TLNEAQVPSQD-----VVEVVVSPYVFLPLVKSTLR----  
Zea\_mays -----MGRKFFVGGNWKCGTTDQVEKIVK-TLNEGQVPSD-----VVEVVVSPYVFLPVVKSQLR----  
Oryza\_sativa -----MGRKFFVGGNWKCGTTDQVDKIVK-ILNEGQI ASD-----VVEVVVSPYVFLPVVKSQLR----  
Fragaria\_vesca -----MGRKFFVGGNWKCGTIDEVKKIVN-LLNDGKVPSPD-----CVEVVVSPYVFLPLVKSTLR----  
Glycine\_max -----MGRKFFVGGNWKCGTTEE VKKIVT-TLNEAKVPGED-----VVEVVVSPFVFLPFVKSLLR----  
Cucumis\_sativus -----MARKFFVGGNWKCGTNEEVKIVS-TLNEAEIPSED-----AVEVVVSPFVFLSLVKSLLR----  
Perkinsus\_marinus -----MSPKPFVGGNWKSNGSVESIKKLAP-ALVAGEATYNKD-----AVDVVIAPTAIHLPLAMEQFKG----  
Aspergillus\_niger -----MPRQFFVGGNFKMNGTADSITSIIK-NLNAAKLDE-----SAEVVVSPPLYLLPARQAG----  
Penicillium\_chrysogenum -----MPRQFFVGGNFKMNGVAQSITDIIVN-NLNAAKLDD-----TTEVVISPPAIYLALTR ELAN----  
Paracoccidioides\_brasiliensis -----MPRKFFVGGNFKMNGTAKSITHIIT-NLNSAKLDP-----STEIVIAPP AIYLALVARQLAN----  
Schizosaccharomyces\_pombe -----MARKFFVGGNFKMNGSLESMTIIE-GLNTPKLNVG-----DVEVFIFQNMYLITTRQOVK----  
Saccharomyces\_cerevisiae -----MARTFFVGGNFKLNGSKQSIKEIVE-RLNTASIPE-----NVEVVICPPATYLDYSVSLVKK----  
Kluyveromyces\_lactis -----MARTFFIGGNFKMNGSKASIKEIVD-RLNGASIPS-----NVEVVIAPP AIYLDH AVALNKR----  
Candida\_dubliniensis -----MARQFFVGGNFKANGTKQQITSIID-NLNKADLPK-----DVEVVICPPALYVGLAVEQNKQ----  
Clavispora\_lusitaniae -----MARQFFVGGNFKMNGTKESITKIID-NLNKADLPK-----DVQVVIAPPAPYLSLAVAENKQ----  
Chlamydomonas\_reinhardtii MQLCKVQRASAARSSRASRS-----QRVEVCASSAKFFVGGNWKCGSVANVAKLVD-ELNAGTIPRG-----VDVVVAPPFIYIDYVMQH LDR----  
Volvox\_carteri MLATRSRLRASGCRSPAVTQPRLLALGRGRLEIVCASNAKFFVGGNWKCGSVASVRKLV D-ELN GSVPRG-----VDIVCAPPFIYIDYVMQH LDK----  
Dictyostelium\_fasciculatum -----MTGSRKFVGGNFKCNGNKSSLQTLIE-SIIKSTLPASE-----IVDIVVSPPSIYLEYV NQLVG----  
Entamoeba\_histolytica -----MSARKFVGGNWKCGT LASIETLTK-GVAASVDAELAK-----KVEVIVGVFFIYIPKVQQILAGEAN  
Cryptosporidium\_parvum -----MSRKYFVGGNFKCNGTKESLKT LID-SFKQVE--SSN-----SEVYVFPTSLHISLVKEFFGNDHP  
Cryptosporidium\_muris -----MARQPFVGGNFKCNGTKDSLRLLLK-SFKDSQI-TTN-----TQVYVFPTFIHIPLAYEILED SG-  
Plasmodium\_falciparum -----MARKYFVAANWKCGTLESIKSLTN-SFN NLDFDPSK-----LDVVVFPVSVHYDHTRKL LQSKF-  
Plasmodium\_vivax -----MTRKYFVSANWKCGTQESVKALAA-SFNE LDFDPAK-----LDVVVFPVSVHYELAKSLLKPKF-  
Paramecium\_tetraurelia -----MRRYFVGGNWKCNNTIAQTQSLINTVINKLVF DVNK-----VEVAVAPIFLHVPWPVQANI QKNV-  
Tetrahymena\_thermophila -----MAIRRLFVGGNWKCNNTLAQTKDLVNNVLNKLHEDPAK-----VDVVVAPVFLHVPWVAEHIQKPV-  
Toxoplasma\_gondii -----MVRTPWVGGNWKCGT VGSITDL CG-EFGKTEFDPKT-----IDVVFPPALHAPLMTREKLPKPY-  
Trypanosoma\_cruzei -----MSKPQPIAAANWKCGSQQSLSELID-LFNSTSI-NHD-----VQC VVASTFHLAMTKERLSHPK-  
Trypanosoma\_cruzi -----MASKPQPIAAANWKCGSESLVPLIE-TLNAATF-DHD-----VQCVVAPTFFLHIPMTKARLTNPK-  
Leishmania\_mexicana -----MSAKPQPIAAANWKCGTTASIEKLVQ-VFNEHTI-SHD-----VQCVVAPTFFVHIPLVQAKLRNPK-  
Leishmania\_donovani -----MSSKPQPIAAANWKCGTTASIEKLVQ-VLNEHNI-SHD-----VQCVVAPTFFVHIPLVQAKLRNPK-  
Giardia\_lamblia -----MPAR-RPFI GGNFKCNGSLDFIKSHVA-AIAAHKI-PDS-----VDVVIAPSAVHLSTAIAANTSKQ-  
Trichomonas\_vaginalis -----MRTFFVGGNWKANPKTVEEA EKLIEMLN GAKVEGN-----VEVVVAAFPFI FLPTLQOKLR----  
Sphingobacterium\_sp -----MRKKIVAGNWKMNMDYQEGISLSEVANMVKDEVIG-----NQOIIVCSPFIHLHSIASLAKESE-

Pedobacter\_saltans -----MRKKIVAGNWKMNKDYSEGLSLFSEVLNMVKDEVRG---EQQVVVCAPYIHLHLSLSALAKGTN-  
 Marivirga\_tractuosa -----MRQKIVAGNWKMNKTLVEAQSLTSEIANMVEDEAPS---DVKVVIAPPAPFIYAVENLIPEMG-  
 Cyclobacterium\_marinum -----MRKKIVAGNWKMNCLLEEGQKLTSEIVNMIKDEPIK---DVKVIINPPFVHLHGKVKLIAGVD-  
 Leadbetterella\_byssophila -----MRKKYAAGNWKMNKTFEEGQILLSEVVMVVKDELTHP---NVQVVLGVPFPYLSSTFSKLVDTTP-  
 Haliscomenobacter\_hydroxiss -----MKTRQQIVAGNWKMNKNYGEGRLEAMEIVERLK---PS---NTQVVLCAPIYIHLQLVKNIKDVAA-  
 Parabacteroides\_distasonis -----MRKNIVAGNWKMNTLAEGGLALAKGLDEALKGKTPN---CDVIIIGTFFTHLASVAAAIDTN--  
 Bacteroides\_fragilis -----MRKNIVAGNWKMNKTLQEGIALAKELNEALANEKPN---CDVIICTPFIHLASVTPLVDA--  
 Prevotella\_ruminicola -----MRKKIVAGNWKMNMLQDGIALAKELNETLKADKPN---CGVVICTPFIHLASIAQFLDQD--  
 Alistipes\_shahii -----MRKKIVAGNWKMNTPAEGVELAKGVVAGRGEVCSC---VNFIVCPPFTHLAMVAEALKGS--  
 Porphyromonas\_asaccharolytica -----MDKRTLIVAGNWKMNMTLDAGLRLITDIKEQVAKLSNP---CKVILAPPYIHLGAMKGLLAGS--  
 Cellulophaga\_lytica -----MRAKIVAGNWKMNKTLTETNALLAELSGKLP---DT---DAEVMVAPTYVNLAAAVEDVKSS--  
 Kordia\_algicida -----MRRKIVAGNWKMNNDLSETEALLNDLIEQVP---NT---DASVMVAPAFVNLFOAFNVLKTF--  
 Flavobacterium\_psychrophilum -----MRAKIVAGNWKMNKNSEETEDLINELIDKLP---NS---NAKIIAPTFFINLASAVDHTEFT--  
 Neisseria\_gonorrhoeae -----MYRQIGMWDQKVVIGNWKMNQRLQNNALMHRF-RILPTAER-----VLIGLAAPTIVYLLQLHNAMQIVLN  
 Francisella\_tularensis -----MQKLIMGNWKMNQNSTSIKELCSGISQVQYDTSR-----VAIAVFPSSVYVKEVISQLPEKVG  
 Mycoplasma\_genitalium -----MRTRYLIGNWKTNKNLKDVSFVEQFQONKLNYN-----AKIGIAPVYVHLTEIKKIISDS--  
 Ureaplasma\_urealyticum -----MVKMYYIIANFKMNATEELINHFNLNLSIFDE-----QKLTIGLAPGDLYLKTFFVLSQTK-  
 Ureaplasma\_parvum -----MKYIIANFKMNATQELINHFNLNLTLEFDE-----QKIIIGLAPGDLYLKTFFVNLAEIK-  
 Buchnera\_aphidicola -----MKKFFITANWKLNGNIKMISSFFKYLKLYSSSYL-----EKNTVIIAPPYIYLERVCKNISNM-  
 Campylobacter\_jejuni -----MIFAANLKNHTRASFKIYAEILNKITIG-VK-----CDDIIVFPP-----SVAFLEKEN--  
 Helicobacter\_pylori -----MTKIAMANFKSAMPFKSHAYLKELEKTLKPOH-----FDMVFVFPD-----FLGLLPSFL-  
 Orientia\_tsutsugamushi -----MESIVSNWKMHFSFSEACNYLNLITSLNSNLN-----LAKMIVAPPNLYLSGLKLPNFNDTY-  
 Wolbachia\_sp -----MSFLIVANWKMNGRSSEFVDFIGKLNNSNEIT-----SKLVICPPFT-----SFPSSIELNN-  
 Methanocaldococcus\_Jannaschii -----MVIVINYKTY-NESIGNRGLLEIAKIAEKVSEESG---ITIGVAPQFVDLRMIVENVNIP--  
 Methanococcus\_voltae -----MIKPVVIINYKTY-MESISDKGLNIAKCAEKVSEESG---IEISVAPQFTDLKTIVEQTNVK--  
 Methanothermococcus\_okinawensi -----MIKPIIIINYKTY-AESVGEKGLKIAKAAEKVSEESG---ISIGVCPQFLDLRMISENVNIP--  
 Pyrococcus\_Woesei -----MAKLKEPIIAINFKTY-IEATGKRALEIAKAAEKVYKETG---VTIVVAPQLVDLRMIAESVEIP--  
 Pyrococcus\_furiosus -----MAKLKEPIIAINFKTY-IEATGKRALEIAKAAEKVYKETG---VTIVVAPQLVDLRMIAESVEIP--  
 Thermofilum\_pendens -----MKIGYPLILINFKAY-SEASGKRGQLAKVAEKVSKETG---ITIAVAPQLTDLAFIASQVEIP--  
 Methanothermobacter\_thermautot -----MLEDELEKDTPIVILNFKTY-LESTGERALELASICGDVADETG---VNMAVAPQHMDLHRVSDAVEIP--  
 Methanosaeta\_thermophila -----MRWSQSLGGMALTLIVLNFKTY-REATGDSAVALSKICESIASEYG---VDIAPVAPQAADIRAVASAVSIP--  
 Natronobacterium\_gregoryi -----MFVLVNLKTY-PCDP---LEIATAVRDVEDTDD---ARLAVAPQAIHIERVAET-GVE--  
 Halobacterium\_salinarum -----MFVLVNLKAY-PCDP---VAIAEAAADVAETTP---ATIAVAPQPADIGRVADT-GAT--  
 Halogeometricum\_borinquense -----MFILVNLKAY-PCDP---LEVATAAHEVAEESG---VRIAVAPQAADVRRVADT-GVE--  
 Methanosphaerula\_palustris -----MSSQFILVNLKAY-KEGMGPRAHMIARAAEEVSEESG---IQIGVAPSFDFDLHPLSKHFEIP--  
 Thermoproteus\_tenax -----MRLPILIIINFKAY-GEAAGKRAVELAKAAERAARELG---VNIIVAPNHLELGLVVSQSDIP--  
 Pyrobaculum\_islandicum -----MKFPILIIINLKAY-GEAAGKKALEIAKAAEKVAKELG---VNIIVAPNHLELALVAQSVEIP--  
 Cenarchaeum\_symbiosum -----MLIINCKNY-KEAAGGRIDSLAAAAAGAAKYG---VRIALAPPQHLLGAVKGEDLT--  
 Nitrosopumilus\_maritimus -----MFVINCKNY-EEISGEKITKFKVKTAEKSKKEK---VKIAICPPPHLIGVVAENSSIP--  
 Desulfurococcus\_kamchatkensis -----MVKP-VLAVNFKAYYPHSFGENAYRLAKDAVRVWRETG---VEVILAPPQHELKSVIEAVKDTG-  
 Pyrolobus\_fumarii -----MRDVYILAVNFKVY-PSAFGRRALEVVKAAERVAREFEG---TVSVIIAPPHTELIARISSSVER--  
 Acidilobus\_saccharovorans -----MPRL-VFAVNFKAY-ETAFNEKSLEIAREASKASSRYG---NVRVILIVPAAIASKVLQIYDD--  
 Sulfolobus\_islandicus -----MKPP-IIVINFKAY-ENSFNGKAIELGKKIEKISKEYS---VEIILSVPATMIYRMVQEVLDLP--  
 Clustal Consensus

\*

|                                   | 110  | 120           | 130                 | 140                      | 150                    | 160         | 170         | 180                | 190 | 200 |
|-----------------------------------|------|---------------|---------------------|--------------------------|------------------------|-------------|-------------|--------------------|-----|-----|
| Roseiflexus_castenholzii          | ..   | ..            | ..                  | ..                       | ..                     | ..          | ..          | ..                 | ..  | ..  |
| Chloroflexus_aurantiacus          | --   | TPIALGAQDVYIE | -PQGAFTGAISPVMLRDLG | CAYVIVGHSERRAIFGEGDELIGK | VRAAL-AHDLT            | -PILCVGETK  | QORDAGHAETV | VVAQVRAAL          |     |     |
| Nostoc_punctiforme                | --   | SPLGLGAQNLYPE | -AQGAFTGEVSPMLVDIG  | CRYVIIGHSESRQYFGE        | SDAFVNRKLRAL-AHGLR     | -PIVCVGESK  | QORDAGQAEPI | IVTAQVRAAL         |     |     |
| Anabaena_variabilis               | --   | SLIQLGAQNIHWE | -EFGAYTGEISGPMLTES  | GVRFVIVGHSERRQYFGET      | DATVNLRLRTAQ-RFGLT     | -PILCVGETK  | QORDAGETES  | LIALQLDKGL         |     |     |
| Synechocystis_sp                  | --   | SRVRLGAQNVHWE | -ASGAYTGEISAAMLTEI  | GIHYVIVGHSERRQYFGET      | DETANLRVLAQA-KAGLI     | -PILCVGESK  | AORDAGETE   | QVIVDQVKKGL        |     |     |
| Cyanobacterium_aponinum           | --   | SRVRLGAQNIHWA | -DQGAFTGEISGEMLKEF  | GINVIVGHSERRQYFGET       | DETVNARLLAAQ-KHGLT     | -PILCVGESK  | AORDAGETE   | AVISAQIEKDL        |     |     |
| Crocospaera_watsonii              | --   | GKVRLGAQNVHWE | -DKGAYTGEISGPMLTEL  | SDYVIVGHSERRQYFSET       | DETANLRVITAQ-RHGLT     | -PILCVGESK  | QORDAGEA    | ESVIINQLQKGL       |     |     |
| Trichodesmium_erythraeum          | --   | SLIRLGAQNVHWE | -DEGAYTGEISGLMLKDV  | GVSYVIVGHSERRQYFGET      | DETVNMRLKAAQ-KHGLT     | -PILCVGETK  | QORDSGETE   | SHIFSQLANDL        |     |     |
| Synechococcus_sp                  | --   | SRVQVGAQNVHWE | -REGAYTGEVSGVMLKEL  | GVRYVVVGHSESRQYFGET      | DETVNARLKAAQ-LHGLT     | -PILCVGETK  | QORDADQTE   | SVITGQIKKAL        |     |     |
| Prochlorococcus_marinus           | --   | SNVSLSSQNVHWE | -DNGAFTAETISPKMLLE  | HSVSYAIVGHSEPRKYFSE      | SDKQINLRKASQ-ANGLI     | -PIVCVGETI  | EQREGEA     | ERVIRRQVEQGL       |     |     |
| Sphaerobacter_thermophilus        | --   | SDIVLGAQDCAVE | -DQGAFTGEVSARMLAPL  | -CRYIIVGHSERRHIIGET      | DEVVAAKLRAVL-RNGAR     | -PILCVGELLE | EREREGEAR   | AVVERQLQSAF        |     |     |
| Anaerolinea_thermophila           | --   | TNIGMGAQNMHWE | -ASGAYTGEVSPKMVAEF  | -CQYVILGHSERRTYFGET      | DETVNRKVKSAI-STGLT     | -PIVCVGETL  | AENEAGKTA   | EVVWRQITEGL        |     |     |
| Myxococcus_xanthus                | --   | APLALAAQNCHE  | -SSGAYTGEISAPMLAEL  | GAYVIVGHSERRQLFGDT       | DEQVNRKRAKAVR-AAGMT    | -PIICVGETL  | AEREA       | NQTLAVVERQVRGAL    |     |     |
| Collinsella_tanakaei              | --   | SAIKLGAQNVYWE | -AAGAYTGESSCDMLKS   | AGCTYCIIGHSERRDYFH       | ETDEDQNKAKALV-AAGLV    | -PVFCCGEP   | LEVREAGTY   | VEHVVAQVKAGL       |     |     |
| Atopobium_vaginae                 | --   | SSIALGAQNVYWE | -ENGAYTGETAPNMLVSL  | GATYCIIGHSERRGYFGET      | DEDINKKAKALL-AHNIV     | -PISCCGES   | LEVREAGK    | HVEFVVEQIKADT      |     |     |
| Eggerthella_sp                    | --   | TRIAIGAQDVYWE | -PKGAYTGEISVPMIKEI  | GCTYCVIGHSERRERLFG       | ETNEDVNRKAKALI-AGGLA   | -PIVCVGESL  | AVRDEGTT    | NEYVCAQVRAAF       |     |     |
| Dictyoglomus_thermophilum         | ---- | IKLGAQNMFW    | -KEGAYTGEISPIMLKDL  | NCTYVIIGHSERRNYFSE       | TNEMINKKIKSAF-NYGLI    | -PIFCVGEK   | WEERER      | ERGKTEEVITKQVREGL  |     |     |
| Aquifex_aeolicus                  | ---- | VKLGAQNCHYE   | -KRGAYTGEISIPMLQEV  | GCEYVIVGHSERRHIFGE       | SDELHKKIVACL-EMGIR     | -PILCVGEK   | KEERE       | EAGMTFKVIETQIKLAL  |     |     |
| Thermodesulfobacterium_yellowston | ---- | IKLGAQNAFYE   | -NKGAYTGEVSPAMLKDC  | GVYVIVGHSERRKYFYEN       | DDIINKKIHACI-KEGLK     | -VIFCIGET   | FFEDRQNK    | TMEILKQIRNGL       |     |     |
| Dehalogenimonas_lykanthroprep     | ---- | IQLGAQNMFOE   | -AKGAYTGEISPVMLQDF  | -CKYVIIGHSERRYFGET       | DDMIKLRAL-KFGLK        | -PILCVGENL  | AQREGGK     | QVQEVIEGQITKAL     |     |     |
| Dehalococcoides_sp                | ---- | IKLGAQNLFYQ   | -EKGAYTGEISPLMLKEL  | -CQYVIIGHSERRYFGET       | GQVNVKRIKAAI-QAGLL     | -PIVCVGEK   | PEENENG     | QTRQVLETQIKAL      |     |     |
| Geobacter_metallireducens         | ---- | IMLSAQDCFW    | -EEGAYTGEISPGMLVD   | AGCSHVIIGHSESRQYFGET     | DETVNRKIKAAI-TAGLT     | -VLFCEGET   | LAEREA      | DKTFFEVLRQIENGL    |     |     |
| Desulfobacter_postgatei           | ---- | IRLGAQNIYPG   | -TEGAYTGEVSGPMIKD   | AGADYVIIGHSESRQYFGET     | DESRLKIRSAL-DAGLI      | -PVMCIGET   | ESQDA       | DETFFFILDQKQITDGL  |     |     |
| Planctomyces_brasiliensis         | ---- | GISVGAQNCYFE  | -ASGAYTGEVSDMLKDIG  | CDVILGHSERRHVIKEDD       | MINKKTKAAI-EGGLQ       | -VVLVGE     | LLEEREA     | DKTEAVLDEQMAAGGL   |     |     |
| Spirochaeta_coccoides             | ---- | PIIVAAQNAADH  | -LSGAYTGEVSLMLKDL   | GVGTVILGHSERRAYGES       | DALINAKTKLAL-SEGFE     | -VILCVGET   | LEEREA      | GKLEDVLSRQVKIGL    |     |     |
| Denitrovibrio_acetiphilus         | ---- | YPISVAAQNISAE | -EKGAYTGDVSAAMVFA   | AGADSTILGHSERRMIFA       | EGDELINQKVTAL-RNNLD    | -VILCVGET   | LDERES      | GVAADRVDVYQVMGL    |     |     |
| Prosthecochloris_aestuarii        | ---- | GIHLAAQNCHE   | -DDGAYTGEVSVRMLDE   | AGCSYVIVGHSERRQYFG       | TNPVNVNLKVKAL-SAGLN    | -VILCVGET   | LDEREK      | GITTEVVTCQVKEGL    |     |     |
| Chlorobium_phaeobacteroides       | ---- | DICLVAQNCHE   | -DEGAYTGEVSVRMLDSL  | GCSYIIVGHSERRQYFGET      | TNRVNLRLKAL-EGGMR      | -VILCVGET   | LEEREA      | GVTDIVTAQVREGL     |     |     |
| Chlorobium_ferroxidans            | ---- | AVQLVAQNCHE   | -NDGAYTGEISTGMLK    | AVGCSYVIIGHSESRQYF       | GETNATVNLRIKAL-AEGLK   | -VILCVGET   | LAERE       | SEVTSKVVTSQVTEGL   |     |     |
| Chloroherpeton_thalassium         | ---- | AIKLAAQNCFYE  | -DQGAFTGEISAAMLRNS  | GCEYVILGHSESRQYFNE       | TDEIVNKKVKAL-SVELD     | -VIMCVGET   | LEQRE       | SGVTKSVVETQVRGGL   |     |     |
| Treponema_pallidum                | ---- | NVLLGAQDVSSE  | -EWGAYTGEVSVLQLED   | LGQVIVGHSERRHGRGEN       | DKLINQKVRVLE-ESGLR     | -VILCVGER   | LQREY       | EAGCTNEVVGTVQVRAGM |     |     |
| Leptospira_interrogans            | ---- | SVIVGAQNCYHS  | -GLAAYTGETSPDQLKEI  | GVKVMVGHSESRQFLGES       | SNFFCNDKIRFLL-KNEFT    | -VLYCVGET   | LSERES      | GKTEVLSSQIREGL     |     |     |
| Borrelia_turicatae                | ---- | NVLLGAQNMSE   | -DSGARTSEISPSMLLE   | FVDYVILGHSECRTYLGD       | TDEVNKKVLAGL-KHPFKY    | LILCIGET    | LEEREN      | NKTLDDVVLNQIRKGL   |     |     |
| Thermotoga_maritima               | ---- | NIKLAGQNVFYE  | -DQGAFTGEISPLMLQEI  | GVYVIVGHSERRIFKED        | DEFINRKVKAVL-EKGMT     | -PILCVGET   | LEEREK      | GLTFCVVEKQVREGF    |     |     |
| Fusobacterium_nucleatum           | ---- | NVKIAAENVYPK  | -IEGAYTGEVSPKMLKD   | IGVTVILGHSERRYFKE        | SDEFINQKVKAVL-EIGMK    | -PILCIGEK   | LEDRE       | GKTEVLAKQIKEGL     |     |     |
| Selenomonas_sputigena             | ---- | NIHIGAQNVHWE  | -KSGAYTGEISTDMLKEI  | GVYVILGHSERRYFGET        | DEGVNKRKAAAF-AAGIT     | -PIICCGEP   | LEIRE       | ANTYIDFVTKQIKAAI   |     |     |
| Ruminococcus_sp                   | ---- | NIQVGAENMYFE  | -EKGAYTGEISPAMLVD   | AGVKYVILGHSERRYF         | GETNEDVNVKVKAF-EHGIT   | -PIMCCGET   | LTQRE       | QVMTDFIRQVQVKG     |     |     |
| Clostridium_botulinum             | ---- | NIKVGAQNMHFE  | -ESGAYTGEIAPKMLEEL  | EGVHYVIIGHSERRYFNE       | TDETVNKKVKAFF-AHNLI    | -PIVCCGES   | LEERE       | GNITKDFVLEGQIKVGL  |     |     |
| Clostridium_perfringens           | ---- | NIKVGAQNMHFE  | -EKGAYTGEIAPRML     | EAMNIDYVIIGHSERRY        | FNETDETVNKKVKAFF-AHNLI | -PILCCGET   | LEQRE       | NGTTNDVIKAQITADL   |     |     |
| Thermoanaerobacter_wiegelii       | ---- | NILLGAQDMFWE  | -EKGAYTGEISPLMLKEI  | GVYVIVGHSERRQYFGET       | DEMVNKKVLSAL-SHGLS     | -PIVCVGES   | LSQRE       | EKGITFEVVLNQTKAL   |     |     |
| Brachyspira_murdochii             | ---- | NIKLAGQNLIFYE | -EKGAYTQGISADMLL    | AVGCEYVIVGHSECRDIF       | GKDELINKKVKRAL-DKNLI   | -PVLVGEH    | LEEREK      | GITSDIVSSQTKAFAF   |     |     |
| Acholeplasma_laidlawii            | ---- | HIRIGAQNMHYA  | -DEGAYTGENSPAQVKTA  | GAEYILIGHSERRSLFNE       | TDKDVNLKMHAAF-KYDLA    | -PILCIGEQ   | LDTRE       | ANKTKEVLDVQLDKAF   |     |     |
| Lactobacillus_reuteri             | ---- | GLKIIAQNAAAE  | -YSGAYTGEISLRGLAD   | AGVSYVMLGHIERRHLF        | HEDNELVNRKVLAAAL-QMGVT | -PIICTDE    | TMVQ        | KEVNGEIHVYFQQLMSVL |     |     |
| Bacillus_subtilis                 | ---- | TDLKVGQNMHFE  | -ESGAYTGEISPVALKDL  | GVYVIVGHSERRMFAET        | DETVNKKHAAAF-KHGIV     | -PIICVGET   | LEERE       | AGKTNDLVDQVKKGL    |     |     |

Bacillus\_thuringiensis --TDLQVGAQNMFHE-KNGAFTGEISPVALSCLKVGYVVLGHSERREMFAETDESVNKKTIAAF-EHGLT-PIVCCGETLEERESGKTFDLVAGQVTKAL  
Listeria\_monocytogenes --TNLRVSAQNCYFE-DEGAFTGEISPFALADLGSYVIIGHSERREYFHETDEDINKKAAIAIF-KHGMT-PIICCGETLDQREAGQDTWVRGQIRAAL  
Geobacillus\_stearothermophilus --TDLKIGAQTMHFA-DQGAYTGEVSPVMLKDLGVTVVILGHSERROFMAETDETVNKKVLAIF-TRGLI-PIICCGESLEEREAGQTNANVVASQVEKAL  
Staphylococcus\_aureus --QGLEIGAQNTYFE-DNGAFTGETSPVALADLGVKYVVIIGHSERRELFHETDEEINKKAAIAIF-KHGMT-PIICVGETDEERESGKANDVVGQVKKAV  
Enterococcus\_faecalis --SEVKLAAQNCYWE-NAGAFTGENSPAIIADLGVYVIIGHSERREYFHETDEDINKKAAIAIF-ANGMT-PIFCCGETLETYEAGKTAEWIEGQITKGL  
Lactococcus\_lactis --SELKLAAEANSYFE-NAGAFTGENSPAIIADLGVYVIIGHSERREYFHETDEDINKKAAIAIF-AAGAT-PIICCGETLETYEAGKTAEWVSGQIEAGL  
Streptococcus\_pneumoniae --SNLKVAAQNCYFE-NAGAFTGETSPQVLKEIGTDYVVIIGHSERRDYFHETDEDINKKAAIAIF-ANGML-PIICCGESLEETEYAGKAAEFVGAQVSAAL  
Erysipelotrichaceae\_bacterium ----LVIAAENCHWE-DSGAFTGEISVPMLEQVGVTHCIIGHSERREMFNDTDETVNKKAKRLI-DAGIT-PIICIGETEAYDAGDSEKVIDRDLTGSL  
Lentisphaera\_araneosa --SPIGIGAQNVFHA-ESGAYTGELSAAMLKEAGIELVIIGHSERRQYFGETNETVNLRTKAAL-AAGIK-PFVCIGETLEEREAGGMEVSVLKAQIVEGF  
Chlamydomphila\_pneumoniae --AFLWLGAQNVHPE-LSGAFTGEISLPMLEKGVGVFVLVGHSEERRHIFGESDAFIASKVKSVA-QAGLV-PVLCVGESLEVREEGKAHQVIKKQLLLGL  
Desulfovibrio\_vulgaris --GFA-IGGQDVYPA-TEGAYTGEIAPGMLLDAGCGWVLTGHSEERRHILGEDDETVAARKTAFSL-KAGLR-VVLCIGEKLDEREAGRLDVLAHQLQVGL  
Mesorhizobium\_opportunistum --VKV--GAQNMHWA-DAGAWTGEISPVMLTDCGLDLVELGHSEERRHFGETDRTVGLKTAATAV-KHGLI-PLICVGETLAERESGEADAVLAKQVEGAL  
Bartonella\_henselae ----ILLGGQNCDFD-DYGPYTGDISAFMLKEAGASHVIIGHSEERRTVYQESDAIVRAKVAQAAW-RAGLV-ALICVGETLEERKSNKVLVDLTRQLEGS  
Brucella\_abortus ----VGLGGQDAHFK-TSGAHTGDISPMLKEAGATHVILGHSEERRDHHESNKLICAKTEAAW-AAGLV-AIVCVGETASERKAERALDVIQDQLSGSL  
Rhizobium\_etli ----LSIGAQDCHQK-ASGAHTGDISAEMIADSGFTYVIVGHSEERRDHAETDHLVRAKAEAAW-AAGLV-AIICIGETADERRAGQALDIKRLSASV  
Agrobacterium\_tumefaciens ----LLIGAQDCHQN-DTGAHTGDISAEMIADCFGTHVIVGHSEERRDHAETDHLVRAKASAAH-QVDLI-AIVCIGETADERKAGQTLDIKRLLAGSL  
Rhodobacter\_sphaeroides ----LMVGGQDCHPK-TSGAHTGDVSAAMLADAGASHVILGHSEERRADHGETDSLVRKAEAAW-GAGLV-AIVCVGETEAQORDAGQTLDVIGAQLAGSV  
Ruegeria\_sp ----IAIGGQDCHAK-TSGAHTGDLSADMLRDAGATYVIIGHSEERRADHGEDADVRAKTEAAQ-AAGLV-AVVCIGETLEEREAGTTLEVVGQLAGSL  
Bradyrhizobium\_japonicum ----VAVGAQDCHPK-ASGAHTGDIAAEMLANAGATAIIVGHSEERRADHGEDALVRQKAEAAW-RAGVT-AIVCIGETQAORDAGQTLDIRGQLDGS  
Rhodopseudomonas\_palustris GALAVAIGAQDCHAN-ATGAHTGDISAEMLDAGARAIIVGHSEERRADHGETDAIVRTKAQAAW-RAGLV-AIVCVGETQGERNAGHTLDVVGQLAGSL  
Methylobacterium\_radiotolerans ----IAIGGQNLHAR-PSGAHTGDISAEMLDLGAQYVIVGHSEERRADHGETDDGVHAKALGAR-RAGLC-GIICVGETIEEREAGRALDVVAGQLAGSL  
Rhodospirillum\_rubrum ----IAVGGQDCHAK-AGGAHTGDVSAAPMLDGCQYVIVGHSEERRADHGETDAIVRTKAQAAW-RAGLV-AIVCVGETEAQORDAGETLAVVSGQLAGSL  
Zymomonas\_mobilis ----MTFGAQDCHYD-ESGSHTGCVSAPMLREVGASVIVGHSEERRIEQNETNEEIRAKTTAI-ANGLV-TIVCIGESRAAHASGQALPIIGAQLDGC  
Gluconacetobacter\_hansenii ----IALGAQDCHQD-PCGAHTGDIAASMLRDLGVQYVILGHSEERRDHELDLTVREKAVAAA-AAGLI-PIICVGESADQRSNGDSQETVQWQIQGSL  
Thermus\_thermophilus --TQVGYGAQDVSAH-KEGAYTGEVSARMLSDLGCRYAIVGHSEERRYHGETDALVAEKAKRLL-EEGIT-PIICVGEPIEVREKGEAVPYTLRQLRGS  
Thermus\_aquaticus --TPIAYGAQDVSPH-REGAYTGEVSARMLADLGCRYAIVGHSEERRYHGESDALVAEKAKRLL-EEGIT-PIICVGEPIEVREKGEAVPYTLAQLLGS  
Oceanithermus\_profundus --SGVAWGAQDVSAH-TFGAYTGEVAAEQLDLGCYVVVGHSEERRAYWNESDALVAAKARRAM-EAGLV-PIICVGERLEEREAGRAVSFTLEQLAGSL  
Deinococcus\_deserti --AGVAYGGQDVSOH-ESGAYTGEISAAMLRDVGAKYAIVGHSEERRYHGETDAVVAAKARQAQ-AHGLT-PIICVGEGLVREKGEHVQYTLAQLRGS  
Bifidobacterium\_bifidum --LKIRYGAQAVSVT-TQGAFTGDVSADMLHLGCSYVIVGHSEERRKYHPEDDANIVDQVRAVL-AAGMQ-PIICVGESFEERRQGIELDFAVGQVHDVT  
Bifidobacterium\_longum --LHVAYGAQAVSVT-TQGAFTGDVSADMLHLGCSYVIVGHSEERRKYHPEDDANIVDQVRAVL-AAGMQ-PIICVGESFEERRQGIELDFAVGQVHDVT  
Gardnerella\_vaginalis --LPILYGAQAVSVT-AQGAFTGDVSADMLASLGCMSVIVGHSEERRKYHPEDDANIVDQVRAVL-AAGMQ-PIICVGESFEERRQGIELDFAVGQVHDVT  
Nocardia\_farcinica --LLLTYGAQDVSVH-ESGAYTGEISASMLAKLGCFTVVVGHSEERRYHEDDATALVGAKKAL-EHGLT-PIICVGEGLNVREAGTHVEYNLEQLRGS  
Mycobacterium\_tuberculosis --LRLTYGAQDLSPH-DSGAYTGDVSGAFLAKLGCYVVVGHSEERRYHNEEDDALVAAKAAATL-KHGLT-PIICVGEHLNVREAGTHVEYNLEQLRGS  
Corynebacterium\_glutamicum --LEVTFGAQDVSOH-ESGAYTGEVSASMLAKLNCSSWVVGHSEERRYHNESEDELVAKAKAAAL-SNGIS-PIICVGEPIEIREAGTHVEYVVEQTRKSL  
Propionibacterium\_acnes --LPIAYGAQDISAH-DDGAYTGEVSGAMLSKLCRYVVVGHSEERRYHNESEDELVNAKAKKVI-ENGMT-PIICCGEALVRKAGKHVEHTVGGQIKADL  
Actinomyces\_odontolyticus --LGIKYGAQDVSIH-DNGAYTGEISTDMLTKLGVSYVVMGHSEERRYHGESDELVGAKARKVF-DAGMT-PIICCGEALVRKAGTYVEFVLGQIRAAL  
Microbacterium\_testaceum --IEFALGGQDLSAH-DSGAYTGEISGQFLAKLNARYVIIGHSEERRQFHNETDEVVAAKTQAAL-RHGLV-PVICVGETSEDLKFGASAVPVGQLEVAL  
Moritella\_marina --GSAIILGAQNTDLN-NSGAFTGDMSPAMLKEFGATHIIIGHSEERRYHAESEDFVAKKFAPLK-ENGLT-PVLCIGESDAQNEAGETMAVCAQRLDAVI  
Photobacterium\_profundum --GSAIILGAQNSDLN-NSGAFTGDMSPAMLKEFGASHIIIGHSEERRYHNESEDFVAKKFAPLK-ENGLT-PVLCIGESDAQNEAGETMAVCAQRLDAVI  
Vibrio\_cholerae --GNKILGAQNTDTH-NSGAFTGDMSPAMLKDFGASHIIIGHSEERRYHNESEDFVAKKFAPLK-ENGLT-PVICIGETEANEAGETMAVCAQRLDAVI  
Shigella\_flexneri --SHIMLGAQNVDLN-LSGAFTGETSAAMLKDIGAQYIIIGHSEERRYHNESEDELIAKKFAVLK-EQGLT-PVICIGETEANEAGKTEEVCAQRIDAVL  
Escherichia\_coli --SHIMLGAQNVDLN-LSGAFTGETSAAMLKDIGAQYIIIGHSEERRYHNESEDELIAKKFAVLK-EQGLT-PVICIGETEANEAGKTEEVCAQRIDAVL  
Salmonella\_enterica --SHIMLGAQNVDLN-LSGAFTGETSAAMLKDIGAQYIIIGHSEERRYHNESEDELIAKKFAVLK-EQGLT-PVICIGETEANEAGKTEEVCAQRIDAVL  
Klebsiella\_pneumoniae --SHIHLGAQNVQDN-LSGAFTGETSAAMLKDIGAQYIIIGHSEERRYHNESEDELIAKKFAVLK-EQGLT-PVICIGETEANEAGKTEEVCAQRIDAVL  
Enterobacter\_aerogenes --SHIHLGAQNVQDN-LSGAFTGETSAAMLKDIGAQYIIIGHSEERRYHNESEDELIAKKFAVLK-EQGLT-PVICIGETEANEAGKTEEVCAQRIDAVL  
Serratia\_symbiotica --SRIALGAQNVQDN-LSGAFTGEISANMLKDVGAQYIIIGHSEERRYHNETDGAISEKFAVLK-EAGLI-PVICIGETEANEAGKTEEVCAQRIDAVL

Yersinia\_pestis --SRIALGAQNVDVN-LSGAFTGETSAEMLKDIGAQYIIIGHSEERRYHQESDELIAKKFGVLK-EIGLI-PVLCIGESEAEENEAGQTEAVCAKQLDAVL  
Actinobacillus\_pleuropneumonia --SVIALGAQNVDVN-VQGAFTGDISTEMLKDFGAKYIIIGHSEERRYHKECDTFIAKKFAALK-AAGLV-PVLCIGETEAEENETGQTEAVCAKQIDAVI  
Pseudomonas\_aeruginosa --KAIDVGAQNSAVEPMQGALTGETAPSQADVGCMSVLVGHSERRLLILGEDVVSRRKFAAQ-SCGLV-PVLCVGETRAEREAGKTELVVARQLGSVI  
Marinomonas\_posidonica --SGLVLAQNLSQY-EKGAYTGEVSTAMLTDFKVTVYLVGHSERRSLYGETDEVVVAEKVKMAL-SAGLK-PILCVGETLEEREAGQTELLVCERQVAAVI  
Xylella\_fastidiosa --EGLAFGAQNVSQH-DKGAYTGEVSAAMVADVGAHYTLVGHSERRYHHEDESSELVARKFAAAL-SAGLR-PILCVGESLPQREAGQTEVAIAMQLAPVL  
Xanthomonas\_campestris --HHLAFGAQDVSSN-EKGAYTGEVSASMLVDVGAHYGLVGHSERRYHQESSELVARKFAAAM-HAGLI-PVLCVGESLEQREAGQTEAILRAQLEPVL  
Marinobacter\_algicola --KKLAVGVQNVACW-SSGAYTGEISAAMAKDCGCGFTLVGHSERRQLFGETDEQVATKVEQAL-ASGLV-AVICVGETLEERDAGKAEDVVSRRQVRKAV  
Aeromonas\_caviae ---RVKLGAQNVSOH-RQGAYTGEISCEMLVEAGCRYVLVGHSERRRLFGETSFIVAEEKFAAVR-AAGLI-PILCVGESGAARQARRTFEIVIAEELDVI  
Pseudoalteromonas\_haloplanktis ----VSTGTQTVSEN-TPGAFTGEVDAQLIKELGAQYVLVGHSERRSIYKESNDVVAAKFARAQ-QVGLT-PILCVGESESEQENKTEQIVAAQIDAVI  
Legionella\_pneumophila ---RIVVGAQNVYPK-DYGAYTGEISAPMLKDFCRYVLVGHSERRQFFHEDENFVAQKFFHVK-DHGMI-PILCVGETLSEERENGKTEQIIAQVLAVS  
Ralstonia\_solanacearum ---AVAWGAQDVSAE-TRGAFTGEVAASMLSEFGCGYVIVGHSERRYHAETDAQVATKALRAL-EHGIT-PIVCVGETLVQREAGETEQQVVARQLDAVL  
Burkholderia\_sp ---SVVWGVQDVSAF-THGAYTGEVAAPMVTDFGATFAIVGHSERRAYHRESAELVAVKAQVRL-DAGLT-PIVCVGETLEEREAGSTEQQVGGQLDEVL  
Bordetella\_pertussis ---AIGWGAQDVSAH-AKGAYTGEVAAPMLAEFGCRWVLVGHSERRTLHAESDQLVADKARAAL-EAGLT-PVVCVGESLQEREGGNTLVGIERQLEPVL  
Nitrosococcus\_watsonii ---VINWGAQNLSHH-EMGAYTGEIAPSMLADLGRFVIIGHSERRTLYGETDSLVAEKAAIAAQ-KVDII-PIICVGETLQEREQNITEQVVERQLNAVL  
Coxiella\_burnetii ---QISWGAQDVSEF-ERGAYTGEVSAAMLRDFHCXYVIVGHSERRQRFGETNEQVAAKVRRAAL-RCGIR-PIICVGETEKQRNANQTLVSIKEQLAVVL  
Variovorax\_paradoxus ---SLALGAQDVSAH-PQGAFTGEQSAAMLKDFGVRYAIVGHSERRYHGETDETVAAKAAAAAL-ANGIT-PIVCVGETLAEREAGQTEEVVVRQLAAVI  
Halomonas\_elongata ---RAALGAQTLSDQ-PSGAFTGEVSGEMLREVGTSLVLVGHSERRQFGEDDSAVLARVRRAL-ECELT-PVLCIGETLEERDADRGEAVVIGQLEAVL  
Tenebrio\_Molitor --ASIGVAAQNCYKV-PKGAFTGEISPAMIKDVGADWVILGHSERRQIFGESDELIAEKVCHAL-ESGLK-VIACIGETLEEREAGKTEEVVFRQTKAIA  
Bombyx\_mori --DNVEVAAQNCWKS-PKGAFTGEISPAMIKDVGWVILGHSERRIFGKDELVAEKVAHAL-ESGLK-VIACIGETLEERESGKTEEVVFRQLKALV  
Apis\_mellifera --NNISIAQONTYKV-AKGAFTGEISPAMLLDNGIPWVILGHSERRNIFGENDELIAEKVAHAL-ESGLK-VIACIGETLEEREAGKTEEVVFRQTKAIA  
Aedes\_aegypti --DSVGVAAQNCYKV-AKGAFTGEISPAMKDLNIGWVILGHSERRIFGESDELIVADKVAHAL-AEGLK-VIACIGETLQEREAGQTEAVCFRQTKAIA  
Anopheles\_gambiae --ETIGVAAQNCYKV-AKGAFTGEISPAMKDLGLGWVILGHSERRIFGESDELIAEKVAHAL-AEGLK-VIACIGETLQEREAGKTEEVVFRQTKAIA  
Drosophila\_melanogaster --CELGLAGQNAKYV-AKGAFTGEISPAMKDLGADWVILGHSERRIFGESDALIAEKVAHAL-AEGLK-VIACIGETLEEREAGKTEEVVFRQTKAIA  
Rhipicephalus\_microplus --PSVALAAQNCYKV-EQGAFTGEISPGMIKDCGGQWVILGHSERRHVFGEEDVLIGEKIKHAL-ESGLN-VIACIGELLEEDREAGRTEEVCFRQIKHIA  
Ixodes\_scapularis --AAIAVSAQNCYKV-EKGAFTGEISPAMIKDCGATWVILGHSERRNVFGESEDELIGDKVHHAL-ESGLN-VIACIGELLEEREAGKTEEVVYRQTAIA  
Anolis\_carolinensis --AKFGVAAQNCYKV-AKGAFTGEISPAMIKDIGATWVILGHSERRHIFGESDELIGQKVAHAL-AEGLG-VIACIGEKLDEREAGITEKVVFEQTKAIA  
Gallus\_gallus --AKIGVAAQNCYKV-PKGAFTGEISPAMIKDIGAAWVILGHSERRHVFGESEDELIGQKVAHAL-AEGLG-VIACIGEKLDEREAGITEKVVFEQTKAIA  
Orcinus\_orca --HKIAVAAQNCYKV-ANGAFTGEISPGMIKDCGATWVILGHSERRHVFGESEDELIGQKVAHAL-AEGLG-VIACIGEKLDEREAGITEKVVFEQTKVIA  
Bos\_taurus --PKIAVAAQNCYKV-ANGAFTGEISPGMIKDLGATWVILGHSERRHVFGESEDELIGQKVAHAL-AEGLG-VIACIGEKLDEREAGITEKVVFEQTKVIA  
Canis\_lupusfamiliaris --AKIAVAAQNCYKV-TNGAFTGEISPGMIKDCGATWVILGHSERRHVFGESEDELIGQKVAHAL-AEGLG-VIACIGEKLDEREAGITEKVVFEQTKVIA  
Odobenus\_rosmarus --AKIAVAAQNCYKV-TNGAFTGEISPGMIKDCGATWVILGHSERRHVFGESEDELIGQKVAHAL-AEGLG-VIACIGEKLDEREAGITEKVVFEQTKVIA  
Oryctolagus\_cuniculus --PKIAVAAQNCYKV-TNGAFTGEISPGMIKDCGATWVILGHSERRHVFGESEDELIGQKVAHAL-SEGLG-VIACIGEKLDEREAGITEKVVFEQTKVIA  
Nomascus\_leucogenys --PKIAVAAQNCYKV-TNGAFTGEISPGMIKDCGATWVILGHSERRHVFGESEDELIGQKVAHAL-AEGLG-VIACIGEKLDEREAGITEKVVFEQTKVIA  
Pan\_troglodytes --PKIAVAAQNCYKV-TNGAFTGEISPGMIKDCGATWVILGHSERRHVFGESEDELIGQKVAHAL-AEGLG-VIACIGEKLDEREAGITEKVVFEQTKVIA  
Homo\_sapiens --PKIAVAAQNCYKV-TNGAFTGEISPGMIKDCGATWVILGHSERRHVFGESEDELIGQKVAHAL-AEGLG-VIACIGEKLDEREAGITEKVVFEQTKVIA  
Pongo\_abelii --PKIAVAAQNCYKV-TNGAFTGEISPGMIKDYGATWVILGHSERRHVFGESEDELIGQKVAHAL-AEGLG-VIACIGEKLDEREAGITEKVVFEQTKVIA  
Macaca\_mulatta --PKIAVAAQNCYKV-TNGAFTGEISPGMIKDCGATWVILGHSERRHVFGESEDELIGQKVAHAL-AEGLG-VIACIGEKLDEREAGITEKVVFEQTKVIA  
Ochotona\_princeps --AKIAVAAQNCYKV-ANGAFTGEISPGMIKDCGATWVILGHSERRHVFGESEDELIGQKVAHAL-AEGLG-VIACIGEKLDEREAGITEKVVFEQTKVIA  
Sus\_scrofa --PKIAVAAQNCYKV-ANGAFTGEISPGMIKDLGATWVILGHSERRHVFGESEDELIGQKVAHAL-AEGLG-VIACIGEKLDEREAGITEKVVFEQTKVIA  
Mus\_musculus --PKIAVAAQNCYKV-TNGPFTGEISPGMIKDLGATWVILGHSERRHVFGESEDELIGQKVAHAL-AEGLG-VIACIGEKLDEREAGITEKVVFEQTKVIA  
Rattus\_norvegicus --PKIAVAAQNCYKV-TNGAFTGEISPGMIKDLGATWVILGHSERRHIFGESDELIGQKVAHAL-SEGLG-VIACIGEKLDEREAGITEKVVFEQTKAIA  
Xenopus\_laevis --AKIALSAQNCYKV-AKGAFTGEISPAMIKDCGATWVILGHSERRHVFGESEDELIGQKVAHAL-SEGIG-VIACIGEKLDQREAGITEKVVFEQTKAIA  
Xenopus\_tropicalis --AKFAVSAQNCYKV-AKGAFTGEISPAMIKDCGATWVILGHSERRHVFGESEDELIGQKVAHAL-SENVG-VIGCIGEKLDQREAGITEKVVFEQTKAIA  
Danio\_rerio --PNIDVAAQNCYKV-AKGAFTGEISPAMIKDCGVWVILGHSERRHVFGESEDELIGQKVAHAL-ENGLG-VIACIGEKLDEREAGITEKVVFAQTKFIA  
Ictalurus\_punctatus --AKIGVAAQNCYKV-AKGAFTGEISPAMIKDCGVWVILGHSERRHVFGESEDELIGQKVAHAL-ENGLG-VIACIGEKLDEREAGITEKVVFAQTKAIA  
Oreochromis\_niloticus --PKFGVAAQNCYKV-PKGAFTGEISPAMIKDCGVWVILGHSERRHVFGESEDELIGQKTAHAL-ENGLG-VIACIGEKLDEREAGITEKVVFAQTKVIA



Nematostella\_vectensis --QNIGVAAQNCYKV-ASGAFTGEISPAMIKDIGCEWVIIGHSEERRNIFGKDELIGEKVAHAL-SANVK-VIACIGELLISEREAGKTQEVVFRQIKAIA  
Schistosoma\_mansoni --KEIHVAAQNCYKV-SKGAFTGEISPAMIKDIGCDWVILGHSEERRNIFGESDELIAEKVQHAL-AEGLS-VIACIGETLSERESNKTEEVVVRQLKAIA  
Strongylocentrotus\_purpuratus --AGVFVAAQNCYKV-PKGAFTAETSPAMLQDLGVGWVILGHSEERRHVFGESDELIAEKVHAL-SCKLK-VVACIGEKLDEREKQTKDNNFRQMRALA  
Caenorhabditis\_elegans --AGVLVAAQNCYKV-PKGAFTGEISPAMIKDLGLEWVILGHSEERRHVFGETDALIAEKTVHAL-EAGIK-VVFCIGEKLEEREAGHTKDVNFRQLQAIIV  
Caenorhabditis\_remanei --AGVLVAAQNCYKV-PKGAFTGEISPAMIKDLGLEWVILGHSEERRHVFGETDALIAEKTVHAL-ESGIK-VIFCIGEKLEEREAGHTKDVNFRQLQAIIV  
Brugia\_malayi --NGIEVSAQNCYKV-EKGAFTGEISPAMIKDLGLHWVILGHSEERRHIFGESDELIAEKLHVAL-DSSLQ-TIFCCGEKLDEREAGTKAVNFRQLQAVI  
Trichinella\_spiralis --PAVGLSAQNCYKV-EKGAFTGEVSASMLRDIGCDWVILGHSEERRHILHESDELVAEKVSMAL-NSGLG-VIFCVGEKLDEREAGHTKDVNFRQLASLL  
Ricinus\_communis --PDFHVAAQNCWVK-KGGAFTGEVSAEMLVNLSPWVILGHSEERRLLLSENEFVGDKVAYAL-SQGLK-VIACVGETLEQREAGSTMVVAQAQTKAIA  
Vitis\_vinifera --PDFHVAAQNCWVK-KGGAFTGEISAEMLVNLGIPWVILGHSEERRLLLSENEFVGEKVAYAL-SKGLK-VIACVGETLEQRESGSTMVVAQAQTKAIA  
Arabidopsis\_thaliana --SDFVAAQNCWVK-KGGAFTGEVSAEMLVNLDPWVILGHSEERRAILNESSEFVGDKVAYAL-AQGLK-VIACVGETLEEREAGSTMVVAQAQTKAIA  
Zea\_mays --QEFVAAQNCWVK-KGGAFTGEVSAEMLVNLGVPWVILGHSEERRALLGESNEFVGDKVAYAL-SQGLK-VIACVGETLEQREAGSTMVVAQAQTKAIA  
Oryza\_sativa --PEIQVAAQNCWVK-KGGAFTGEVSAEMLVNLSPWVILGHSEERRSLLGESNEFVGDKVAYAL-SQGLK-VIACVGETLEQRESGSTMVVAQAQTKAIS  
Fragaria\_vesca --PDFQVAAQNCWVK-KGGAFTGEVSAEMLKNEVPWVILGHSEERRALLGETNEFVGDKVAYAL-SQGLK-VIACVGETLEQREAGSTVEVVAQAQTKAIA  
Glycine\_max --PDFHVSAQNCWVR-KGGAYTGEVSAEMLVNLGIPWVILGHSEERRLLNELNEFVGDKVAYAL-QQGLK-VIACIGETLEQREAGTTTAVVAEQTKAIA  
Cucumis\_sativus --SDIQVAAQNCWVR-KGGAFTGEVSAEMLVNLGIPWVILGHSEERRLLKESNEFVGDKVAYAL-SQGIK-VIACVGETLEQRESGSTIEVVAQAQTKAIA  
Perkinsus\_marinus --SNIQISAQNCSTK-GPGAYTGEITAEMIKDAGLNWTLGHSEERRHLFNETNEDLAAKVAKAE-AAGLK-IIFCIGELLEEREAGKTEEVCAQMDAIV  
Aspergillus\_niger --EKIGVAAQNVFDK-PNGAFTGEISVEQLRDVKIDWTIIGHSEERRVILKESDEFIARKVKAAL-DGGLS-VIFCIGETLEEREANKTIDVVTQQLNAVA  
Penicillium\_chrysogenum --PKIGVAAQNVYDK-PNGAFTGEISVEQLRDNKINWAVIGHSEERRVILKESDEFIARKTKAAL-EGGVS-VIFCIGETLEEREANKTIEVVTRQLNAVA  
Paracoccidioides\_brasiliensis --GQVAVSAQNVFDK-PNGAFTGELSVEQLRDEKITWTLGHSEERRVLLREDDEFVARKTKAAL-NGGLN-VILCIGESLEEREAGKTIDVVTQQLDAVA  
Schizosaccharomyces\_pombe --KDIGVGAQNVFDK-KNGAYTGENSAQSLIDAGITYTLTGHSEERRIFKESDEFVADKTKFAL-EQGLT-VVACIGETLAEREANETINVVTRQLNAIA  
Saccharomyces\_cerevisiae --PQVTVGAQNAYLK-ASGAYTGENSDQIKDVGAKWVILGHSEERRSYFHEDDKFIADKTKFAL-GQGVG-VILCIGETLEEKKAKTLDVVERQLNAVL  
Kluyveromyces\_lactis --KEVKISAQNAYSK-ASGAYTGENSVEQIKDVGAEWVILGHSEERRTYFNETDEIVAQKVFAL-DSGVK-VILCIGETLEEKQONITLQVVRQLNAVL  
Candida\_dubliniensis --PTVAVGAQNVFDK-ACGAFTGETCASQILDVGATWTLTGHSEERRTIKESDEFIAEKTKFAL-DNGVK-VILCIGETLEERKAGITLDVCAQQLDAVS  
Clavispora\_lusitaniae --STVAVAAQNVFNK-ASGAYTGEISPEQLKDLGATWTLTGHSEERRTIKESDEFIAEKTKFAL-DSGVS-VILCIGETLEERKAGITLDVCAQQLDAVS  
Chlamydomonas\_reinhardtii --DKYQLSAQNAWIG-GNGAFTGEVSAEQLTDFGVPWVILGHSEERRSLFESNEVVAKKTSHAL-AAGLG-VIACIGETLEQRNSGSVFKVLDAQMDALV  
Volvox\_carteri --DKYQLAAQNCWIG-GNGAYTGEVSAEQLQDFGLPWVILGHSEERRSLCGETNQVVAKKTALHAL-DVGLG-VIACVGETLDQRNSGAMFQVLDGQMQUALV  
Dictyostelium\_fasciculatum --QRVQVAAQNCYSE-TKGAYTGEISAEMIVDIGLKWVILGHSEERRNLFKESNQQLIAKKTQHAL-SQGLS-VIFCIGELLEQRETNKTEQVLDEQLGFL  
Entamoeba\_histolytica --GANILVSAENAWTK-S-GAYTGEVHVGMVDCQVPYVILGHSEERRQIFHESNEQVAEKVVAI-DAGLK-VIACIGETEQAQRIANQTEEVVAQAQKAIN  
Cryptosporidium\_parvum --GVFKIGSQNISCT-GNGAFTGEVSCMLKMDVDCSLVGHSEERRQYYSETDQIVNNKVKGL-ENGLK-IVLCIGESLSERETGKTNDVITQQLTEAL  
Cryptosporidium\_muris -----INIGSQDISST-GNGAYTGEVSCDILKDYNIHCTLIGHSEERRQYYSETDSVNAKVLHAL-KHNFT-VVLCIGESLQERESGKTNDVIKHQLEFAL  
Plasmodium\_falciparum -----STGIQNVSKF-GNGSYTGEVSAEIAKDLNIEYVIIGHFERRKYFHETDEDVREKLQASL-KNNLK-AVVCFGESLQERESGKTNDVIKHQLEFAL  
Plasmodium\_vivax -----HTGIQNVSKF-GSGSYTGEISAEIAKDLNIEYVIIGHFERRKYFHETDEDVREKLQASL-KNNLK-VVVCFGESLQERESGKTNDVIKHQLEFAL  
Paramecium\_tetraurelia -----QVALQNSSLT-KVGAYTGEISVEQVKDLAIWVILGHSEERRQYYGETNEIVGKKTTRIAL-DYQLS-VMACVGEKLAEREAGQTTQVIQAQLDAIK  
Tetrahymena\_thermophila -----QVSVQNTSLT-GTGAYTGEISVAHVKDLGLNWAILGHSEERRQYYGETNEVVANKVKYAV-ENGLD-VIACVGEHLADREANQTNQVVEGQLEAIR  
Toxoplasma\_gondii -----HVGLQNCSTK-HNGAFTGEISVEMIKDFGLRWILGHSEERRQYYGESDEVVAEKVNIILQEKDLN-VVLCVGEQLKDREANKTNDVVAQQLAACL  
Trypanosoma\_brucei -----FVIAAQNAIAK-S-GAFTGEVSLPILKDFGVNIVLGHSEERRAYGETNEIVADKVAQAAV-AAGFM-VIACIGETLQERESGRTAVVLTQIAAIA  
Trypanosoma\_cruzi -----FQIAAQNAITR-S-GAFTGEVSLQILKDYGIKWVILGHSEERRLYGETNEIVAQKVAQAC-AAGFH-VIVCVGETNEEREAGRTAAVLTQLAAVA  
Leishmania\_mexicana -----YVISAENAIK-S-GAFTGEVSMPIKDLIGVHWVILGHSEERRTYGETDEIVAQKVSEAC-KQGFV-VIACIGETLQOREANQTAQVLSQTSIAIA  
Leishmania\_donovani -----YAVSAENAIK-S-GAFTGEVSMPIKDLIGVHWVILGHSEERRTYGETDEIVAQKVADAC-KQGFV-VIACIGETLQOREANQTAQVLSQTSIAIA  
Giardia\_lamblia -----LRIAAQNVYLE-GNGAFTGETSVEMLQDMGLKHWVILGHSEERRIMGETDEQSAKAKRAL-EKGMT-VIFCVGETLDERKANRTMEVNSIAQLEALG  
Trichomonas\_vaginalis --KDWKVSAENVFTK-PNGAFTGEVTPMIKSGFIEWTLGHSEERRDILKEDEFLAAKAKFAL-ENGMK-IIYCCGEHLISEREAGKASEFVSAQIEKMI  
Sphingobacterium\_sp ---NVSVGAQNIHQE-DAGAYTGEISAKQVRSTGAEXVILGHSEERRAYFGESELLAQVNIAL-THGLI-PIFCIGETREERESGDFDVIKTQLEKGV  
Pedobacter\_saltans ---NVFVGAQNAHQE-ASGAYTGEISTGMLKSVGVEYVILGHSEERRQYFGENNELLAKKTNTAL-ANDLK-PIFCIGETLAERESNQHFQDVIKTQLAQLEAT  
Marivirga\_tractuosa ---QIVLAGQNCQOE-DAGAYTGEVSAEMLKSLGAQYVILGHSEERRHVFSETDEELAKKTNDAL-KNDLK-VIFCCGEPLEREADTQNEYVTKQLTNSL  
Cyclobacterium\_marinum ---NIALGAQNCSDK-EAGAYTGETSAAMLASFGAEYVIIGHSEERRSMFNESNELLTEKTKQAL-SNGLT-PIFCGEPLEREADTHEYVKAQLESL  
Leadbetterella\_byssophila ---KVALAAQNCYPK-ASGAYTGEVSPMLKSVGVYVIIGHSEERRREYFAESDAFIAEKVDAIL-AEGLT-PIFCGETLSQREAGIHFDVVKQLTNSL

```

Haliscomenobacter_hydrossis      ---SLYLGAQNCHQE-DKGAYTGEISVDMLKSVGVSYVILGHSEERREYFGESDELLAKKTDKVL-AAGLL-PIFCCGESLDIRDAGTHVAHVQAQIKAGL
Parabacteroides_distasonis      ---KIGVAAENCADK-EKGAYTGEVSAAMVASTGAKYVILGHSEERRAYYHETPEILKTKVELAL-ANGLT-PIFCIGEVLEEREAGKHFEVVDQAQIAGSL
Bacteroides_fragilis            ---KIGVGAENCADK-ESGAYTGEVSAAMVASTGAKYVILGHSEERRAYYGETVEILKDKVKLAL-ANGLT-PIFCIGEVLEEREANKQNEVVAAQLA-SV
Prevotella_ruminicola           ---IIGLGAENCADK-EKGAFTEVSAEMVKSTGAQYVILGHSEERREYKETEPEILKEKVLALQ-KNDLK-VIFCIGESLEEREAGKQNEVVKALEGSV
Alistipes_shahii                ---DVALGAQDCATE-AKGAYTGEIAASMI AALGCKYVILGHSEERRQYGETSATLNKMAQAY-ANGLI-PIYCVGENLDEREAGKHFDVVKAQIEEVV
Porphyromonas_asaccharolytica   ---DIEYAAQDCSAH-DAGAYTGEVSAEMIRSCGCTYVIIHSEERRAYYHESAEELLAQKIDQAL-AHGLK-VIFCVGEQQAEREGRNRYFEVVDQQLRGS
Cellulophaga_lytica             ---TIQVIAQNMHFA-DNGAYTGEISADMLLDIGINTVIIHSEERRAYYFGETDEILAKKVIKAL-EKNLR-VVFCFGEELEDKSDNHFNIVASQLKNAL
Kordia_algicida                 ---NVEVIAQNMHQE-AKGAYTGEVSARMLKSVGIKTIVILGHSEERRAYYFGETDELLAKKVDAAAL-ANELE-IIFCFGEELEDKAGNHFNIVENQLKNAL
Flavobacterium_psychrophilum    ---NIRVAAQNMHQA-ENGAYTGEISADMLKSIGVNTVILGHSEERRAIFHETDAIISFKVDLAL-RHEMT-VIFCFGEELKDRQNKQHFNIVENQLRDGL
Neisseria_gonorrhoeae          N--RILTCAQDVSRFPDNGAYTGEVSAEMLADTGTDIVLIGHSEERSLYFGEKNEIQRRKMENVL-NVGLI-PLLCVGESLEERETGKEHEVIAHQLS-IL
Francisella_tularensis         -----VGLQNT-FYDDGAYTGEISARMLLEDIGCDYLLIGHSEERSLFAEDEDVFKLNKII-DTTTT-PVVCIGESLDDRQSGKIKQVLAQSLIL
Mycoplasma_genitalium           -----LLLFAQDANFI-ESGSYTGTVSFTQLQDIGVNSIIGHSEERRKYNETSAVINQKLEACL-KASMQ-VVLCIGAL-----GQEISFLKTDLTNCL
Ureaplasma_urealyticum         ---KVKLYAQNPAY-SKGPYTGQISCLQLLDINIKNALVGHSEIRIDCSQS--IIDQKTKICM--DLLDQVVICIGEPDVEYEQK--KSLSFVLSQLAN
Ureaplasma_parvum              ---KVNLYAQNPALH-NKGPYTGQISCLQLLDINIKNALVGHSEIRIDFSQS--IIDQKIKISM--DLLEQVVICVGETTFDAYKQN--KSLNFVLNQLAN
Buchnera_aphidicola            ---NIFLGSQNVGIN-LNGAFTGETSILMLRDIGVKYVIIHSEERRFLHETDDIIAKKFLIK--KSNLTPILCVGETEIEKKNH--QTEQVIQRQLNL
Campylobacter_jejuni           ---NFIQGAQNFYPC-VNGAFTGELGKEHLDEFGIKCVLIGHSEERRALGDEE--FIKAKDFEAK--EHGYKIVFCIGENLDTKNSG--KTLEFLKKQLEI
Helicobacter_pylori            ---HFTLGVQNAAYPR-DCGAFTGEITSKHLEELKIHTLLIGHSEERRLLKESPSFLKEKDFEFK--DNKFKIVYCI GEELTTREKGFKAKEFLSEQLN
Orientia_tsutsugamushi         ---HFSAQDVSMITE-SSGPYTGGEISASMLKNLNVYAIVGHSEERRLLFYEDANTIALKVRNCI--NNAIVPIVCI GEPIEARKNK--TYLQYLAQQLSS
Wolbachia_sp                   ---NINIGAQNCHKH-KFGSYTGEISAEMLEKELGCTYVILGHSE---ANEKDESEIKLSEIAI--ESGLHPIICVGENSEDYKNE--KTKEVIEYQCKN
Methanocaldococcus_Jannaschii   -----VYAQHIDNI-NPGSHTGHILAEAIKDCGCKGTLINHSEKRMLLADIEAVINKCKNLGL-----ETIVCTNNTSKAVAALSPDC-----
Methanococcus_voltae           -----VYSQHMDAI-KPGSNTKILPEAVKSTGAFGTLINHSEKRLLLSDIEEINKSKELKL-----ESVCTNNTGSKAVSALSPDY-----
Methanothermococcus_okinawensi -----VYAQHFDVAI-SPGSHTGHVLAETLKDCGLNGSLLNHSEKRMILADLEAIRAEEVGL-----ETIVCTNNTGSKAVAALNPNM-----
Pyrococcus_Woesei             -----VFAQHIDPI-KPGSHTGHVLP EAVKEAGAVGTLINHSENRMLADLEAIRAEEVGL-----MTMVCNNPAVSAVAALNPDY-----
Pyrococcus_furiosus           -----VFAQHIDPI-KPGSHTGHVLP EAVKEAGAVGTLINHSENRMLADLEAIRAEEVGL-----MTMVCNNPAVSAVAALNPDY-----
Thermophilum_pondens           -----VFSQHVDDV-PPGSYTGHTVLEAVKDAGAVGTMVNHSEERRVADQVDVIVKRARSIGL-----TTVVCTNTPEVTAAMAALGPDM-----
Methanothermobacter_thermautot -----VLAQHIDAV-DAGGHTGSILAECARDAGAAGTLINHSEKRMQLADIEWVISRMKELEM-----MSVCTNNTVMTTAAAAALGPDF-----
Methanosaeta_thermophila       -----VYAQHVDPV-GFGSFTGHITAASVKAAGASGSLINHSEERRLRADIEASLRACRSEGL-----TSIICNTNVATTRAALRPDY-----
Natronobacterium_gregoryi      -----TWAQHVDPI-EHGSNTGHTLAESVADAGAVGTLVNHSEERRLKLADIDGAVRAAERADL-----ETVVCANNPEQIGAGAALGPDA-----
Halobacterium_salinarum        -----TYAQHVSPT-EHGSHTGSVLAESVADNGAVGTLVNHSEHRRRLADIDGSAVAAERAGL-----DTVVCANNPAQVAAAAALGPDA-----
Halogeometricum_borinquense    -----TWAQHVDPI-GYGSHTGSTLAESAAGADGTLINHSEKRLKLADIDGSAVAAERAGL-----ETVVCANNPAQIGAVAALGPDS-----
Methanosphaerula_palustris     -----VFAQHLDGV-VPGAFTGHVTA AAVRQTGAVGTLINHSEERRLTLAEIEASVRAATEAGL-----VTVICSNNDMTSAAAAALSPTY-----
Thermoproteus_tenax            -----VYAQGADVE-AGGAHTAHVSL ENIKEAGGSGVILNHSEAPLKLNDLARLVAKAKSLGL-----DVVVCAPDPTSLAAAAALPHA-----
Pyrobaculum_islandicum        -----VYAQGADVE-TPGAYTAHIAVDNIKAVGASGLILNHSEAPLALNQLSKLAARAKSIGL-----DVVICAPDPVTSLAAAAALPHA-----
Cenarchaeum_symbiosum         -----VLAQHIDDK-GVGSTTG YVPELLGESGVSGALINHSEHRVSADQVASLVPRLRGLDM-----ISVVCVKDSAEAAANLSRHRPDY-----
Nitrosopumilus_maritimus       -----IFAQHIDDK-KVGSTTG FVPELLKKSQVNGSGLINHSEHRVSSKEITKLVSKLKLKLM-----TSIVCVKDVAEARKYAKLNPY-----
Desulfurococcus_kamchatkensis  -----VKVFAQHADPV-EPGAITGFIPLEGLKNGLAHGVLNHSEHRLKISDINYLKVKARRLGI-----ETLVCADTPETGA AVAVLGPDM-----
Pyrolobus_fumarium            -----VIVYAQHVDPV-EPGAHTGSVPVEAVKEAGARGSLVNHSEKRLRLDEIERVVERLKVVGL-----EQLVCADTPRAAAAIAVFPTY-----
Acidilobus_saccharovorans     -----VYIEHADPV-DYGAYTGYLPAKAARLLGVRGILVNHSEHKMIYRDVAKVVEVETASKDGI-----ETMACADTPGEAAGLAYLRPTY-----
Sulfolobus_islandicus         -----IYAEHVDPV-PLGAYTGA VLPEMIKDADAKGTLINHSEHRRRLADEIDDLVLRTRKLG L-----SSILCVDRYELVYPFSLLRPDA-----
Clustal Consensus              . * . * * * * * * *

```

210 220 230 240 250 260 270 280 290 300  
Roseiflexus\_castenholzii TGMTPEQ--IGRIVIAIEPVWAIGTGDTATPADAQAMHE-TIRRILGDMAG--SDTAATINILYGGSVKPDNIDDLMAQPDIDGALVGGASLKADSFLR-  
Chloroflexus\_aurantiacus LEVPPDQ--MANVVIAYEPIWAIGTGDTATPADAQAMHA-AIRATLAELYG--SEIAATVRIQYGGSVKPDNIDELMAQPDIDGALVGGASLQAASFRL-  
Nostoc\_punctiforme VDDIQN----NLVIAIEPIWAIGTGGETCEAVEANRIIG-LIRSQLSNPN-----VSIQYGGSVKPNNIDEIMAQPEIDGVLVGGASLEPESFAR-  
Anabaena\_variabilis INVDQT----NLVIAIEPIWAIGTGDTCEETEANRVIG-LIRSQLNKND-----VPIQYGGSVKPNNIDEIMAQPEIDGVLVGGASLEAASFAR-  
Synechocystis\_sp VNVDSQ----NLVIAIEPIWAIGTGDTCAATEANRVIG-LIREQLTNSQ-----VTIQYGGSVNANNVDEIMAQPEIDGALVGGASLEPQSFAR-  
Cyanobacterium\_aponinum VNVDSQ----NLVIAIEPIWAIGTGDTCEAAEANRVIG-LIRSQLTNKN-----VTIQYGGSVNPKNVDEIMAQPEIDGALVGGASLDPEFAR-  
Crocospaera\_watsonii VDDVDS----NLVIAIEPIWAIGTGDTCESTEANRIIR-VIRDQLSNKN-----VTIQYGGSVKPNNIDEIMAQSDIDGALVGGASLDPVNFAR-  
Trichodesmium\_erythraeum VDDVDE----NLVIAIEPIWAIGTGDTCEAKEANRVIG-LIRGKLNSN-----VTIQYGGSVKPNNVDDIMAQEEIDGALVGGASLNPEFSFR-  
Synechococcus\_sp VDIQNF----NLVIAIEPIWAIGTGDTCAADEADAVIG-KIRALLDNKE-----VSIQYGGSVKPNVDEIMAQSEIDGALVGGASLTPDSFAR-  
Prochlorococcus\_marinus EETDKK----KLIVAYEPIWAIGTGKTCEANEANRIG-LIRQWANCPE-----ILIQYGGSVKPGNIDEIMAMSDIDGVLVGGASLDPEFAR-  
Sphaerobacter\_thermophilus ADVEAAD--VLRTVIAIEPVWAIGTGRAATPEDAR-EMANWIREVLARHVG--AEAANEIRVQYGGSVNADNAAGFLSLPEIDGALVGGASLKADQFTQ-  
Anaerolinea\_thermophila KDLLPEE--GLKLVIAIEPVWAIGTGRAATAEVAQSVHANVVRPALAHFVG--QEVAGQIRIQYGGSVTAKNAPELFAFPDIDGALVGGASLKAGEFFAA-  
Myxococcus\_xanthus EGFGAKE--VAGFVLAYEPIWAIGTGRNATAAQAEVHA-AIRGLVERLYD--GETAGRVRIQYGGSVKPDNAEELGQPDVDGALVGGASLKAGDFAA-  
Collinsella\_tanakaei EGLEIAD--PAQLVVAYEPIWAIGTGMTATADDAQEVCA-AVREALADLFG--AELASGIRVLYGGSAPGNIAELTAKPDVDGALVGGASLKAADFSQ-  
Atopobium\_vaginae KGLTLTS--PSQYVVAYEPIWAIGTGKTATAEDAQEVCS-AIRATLRDIFG--AELANGIRVLYGGSAPPENIAGFLAEEDVDGALVGGASLKADSFAA-  
Eggerthella\_sp AGIDATD--AKVCVVAYEPIWAIGTGRTATPEQAEVCA-AIRATLAELYG--ADVSEAMRVLYGGSMPGNVEGLMAQPNIDGGLVGGASLDATSFAE-  
Dictyoglomus\_thermophilum EGLEKEN--VEKIVIAIEPVWAIGTGHSAKGEDANEVAG-LIRKIISEMYD--TEVSQKIRIQYGGSVNPQNITEFLSQNEIDGALVGGASLKQPFSFN-  
Aquifex\_aeolicus TGVE-EH--TDKIDIAIEPVWAIGTGTPATPEDAVEVHT-FIRNLINQLNP--KNE-GKTRILYGGSVNPQNAKEFMKHEEINGLLVGTASLDPEFSAK-  
Thermodesulfobacterium\_yellowston LEIN--S--PEALTYAYEPIWAIGTGVVATEEQIKQSHL-FIRNQLKEYG--ERA-NEVRILYGGSVTPENIKSIMAIDNVEGVLVGGASLDPLKFAK-  
Dehalogenimonas\_lykanthroprep DGVN----SPDIYVAYEPIWAIGTGRAATGDIANETAM-LIRNVGKLYG--NAVSQALPILYGGSVNPNISDFISRSIDGALVGGASLKAQEFVE-  
Dehalococcoides\_sp DGLN----LSCIIIAYEPIWAIGTGKAATASEANSAIG-YIRRVGLDITLQ--NAAQTSPILYGGSVNEKNITEILSQTNIDGALVGGASLKAQESFVS-  
Geobacter\_metallireducens AGLARGD--LAKIVIAIEPVWAIGTGKTATDEQAQIAHA-FIRKVVGELEFT--VQIAETIRILYGGSVKPNVVRGLMNQPDIDGALVGGASLKADSFGA-  
Desulfobacter\_postgatei KGFDLGD--LDTLILAYEPIWAIGTGKTAGPEQVKEVHG-FLRHLLKEKYA--EGLAATIRILYGGSVKPGNIKDLMLQLEDVDGALVGGASLNPEDFNE-  
Planctomyces\_brasiliensis KDISAEQ--MTNVVIAIEPVWAIGTGKTASPEQAEQHA-HLRKWLADRYT--SEVAEQTRILYGGSVKPANAKELLGQONVDGALVGGASLTVDNFGP-  
Spirochaeta\_coccoides GGVSSAD--MSRVVIAIEPVWAIGTGKTATPDDADNAHA-YIRGLINGLYG--KDVAEQLIQYGGSVKADNVKELMAKPNVDGALVGGASLSIDKFLP-  
Denitrovibrio\_acetiphilus KDIGMDR--INRVTLAYEPIWAIGTGKTATPADAEDIHG-KIRTQLSKMYG--PVVAEKIRILYGGSVKPDNVSALMMRENIDGALVGGASLDATSFAK-  
Prosthecochloris\_aestuarii EGV--AD--IGDIVIAIEPVWAIGTGKTASSLQAEVHA-SIRATVAGLYS--EPAAGVRIQYGGSVKPSNAEELFAMPDIDGGLIGGASLNAEDFVA-  
Chlorobium\_phaeobacteroides ADI--ED--LGNVVLAYEPIWAIGTGKTATPEQADAVHA-SIRATISDMYG--EADAEDIRIQYGGSVKPSNAVELFGMPNIDGGLIGGASLKADDFVA-  
Chlorobium\_ferrooxidans AGI--SD--ISTVVIAIEPVWAIGTGKTASSAQAEVHL-LIRNTITKLYG--DAAAGKLRIQYGGSVKPSNAEELFAMPNIDGGLIGGASLNAADFAA-  
Chloroherpeton\_thalassium KDLTAED--MKSVVIAIEPVWAIGTGKTATPEQAQEVHA-FIRGIVKDMFG--EEVANELRIQYGGSVKPSNAKELFGMPDIDGGLIGGASLNAEDFVE-  
Treponema\_pallidum ADVCGSL--MHNVTVAYEPIWAIGTGKTATPAQANAVHA-HIRSVVREMYG--AAIAEALCIQYGGSMKAENARALLAEHIDGGLIGGASLEAASFVP-  
Leptospira\_interrogans KGIDSVF--FSNLILAYEPIWAIGTGKVATPSQAQEVHS-FIRKEISGLFVGASSISESISILYGGSVKPDNIQDLLKEKDIDGGLVGGASQKISSFAE-  
Borrelia\_turicatae ISVSESD--LKRIILAYEPIWAIGTGKTATKEEAQEVHR-AIRHEVELLYS--VSAANNIIQYGGSVNIDNVKGLMGESDIDGALIGGASLKADSFLN-  
Thermotoga\_maritima YGLDKEE--AKRVVIAIEPVWAIGTGRVATPQAQEVHA-FIRKLLSEMYD--EETAGSIRILYGGSIKPDNFLGLIVQKDIDGGLVGGASLK-ESFIE-  
Fusobacterium\_nucleatum VDLKED--AEKTIVAYEPIWAIGTGKTATPEMAQETHK-EIRNVLAEMFG--KDVAKMIQYGGSMKPENAKDLLSQEDIDGGLVGGASLKADSFFE-  
Selenomonas\_sputigena DGFSADE--AAQLVIAIEPIWAIGTGKTATFEQAEVCA-AIRATVAEVFN--KDAEGRIRIQYGGSVKPATIAGLMEKPNVDGALVGGASLKAKDFSE-  
Ruminococcus\_sp QGVTADQ--AKTVIAIEPIWAIGTGKTATTEQAQEVCA-GIRACIAEIYD--EATAEAIQYGGSVNPATAPDLFVQNDIDGGLVGGASLKA-DFGK-  
Clostridium\_botulinum KELSKEQ--VEKLVIAIEPIWAIGTGKTATDEQANETIG-YIRTVVKAMYD--ESVADKIRIQYGGSVKPGTIKAQMAKKEIDGALVGGASLKAEDFAA-  
Clostridium\_perfringens EGLTKEQ--AEKVVIAIEPIWAIGTGKTATSDQANETIA-AIRAMVAEMFG--QEVADKIRIQYGGSVKPNITIAEQMAKSIDGALVGGASLVAADFAQ-  
Thermoanaerobacter\_wiegelii KGVSHDD--IVNVVIAIEPIWAIGTGKTATAKDANEVIK-AIRNTIASLYG--KGKASLVRIQYGGSVKPENISELMAESDIDGALVGGASLVAADFVAK-  
Brachyspira\_murdochii KGLSEAE--AKKVVIAIEPVWAIGTGKTATPQDADEVHK-TIRETLKSLYN--ESVAEGMIILYGGSVNEKNADDLLNMPNIDGALVGGASLVAADKFAK-  
Acholeplasma\_laidlawii EGVSKAQ--ALKTVIAIEPVWAIGTGKTATPQMANDTIK-DVRAKLSLDLYG--AEVAAQVRILYGGSVKPDNIESLLQESDIDGALIGGAALDHKNFLT-  
Lactobacillus\_reuteri RGVSLDQ--IKNVVSYEPSWAVGYQHANPVLAEQCR-QIRRTIADNYT--YEIADKIRILYGGSVNPDNIGMIMNKPVDVGLIGRASLDVDNFLR-  
Bacillus\_subtilis AGLSEEQ--VAASVIAIEPIWAIGTGKSSSTAKDANDVCA-HIRKTVAESFS--QEAADKLRIQYGGSVKPANIKIEMAESDIDGALVGGASLEPQSFVQ-

Bacillus\_thuringiensis AGLTTEEQ--VKATVIAYEPIWAIGTGKSSSSADANEVCA-HIRKVVAEAVS--PEAAEAVRIQYGGSVKPENIKEYMAQSDIDGALVGGASLEPASFLG-  
Listeria\_monocytogenes AGLTTEEQ--VIKSVIAYEPIWAIGTGKSSSTSADANETCA-VIRAEVADAVS--OKAADAVRIQYGGSVKPENIADYLAESDIDGALVGGASLEPASFLA-  
Geobacillus\_stearothermophilus AGLTPEQ--VKQAVIAYEPIWAIGTGKSSSTPEDANVCG-HIRSVTSRLFG--PEAAEAIRIQYGGSVKPDNIRDFLAQQQIDGPLVGGASLEPASFLQ-  
Staphylococcus\_aureus AGLSEdq--LKSvVIAYEPIWAIGTGKSSSTEDANEMCA-FVRQTIADLSS--KEVSEAVRIQYGGSVKPNNIKEYMAQTDIDGALVGGASLKVEDFVQ-  
Enterococcus\_faecalis VGLSNEQ--VASMVIAYEPIWAIGTGKSADANIADIEICG-VVRSTVEKLYG--KEVSEAVRIQYGGSVKPENIAEYMAKENVDGALVGGASLEADSFLA-  
Lactococcus\_lactis AGLTAEQ--VSNLVIAYEPIWAIGTGKTATNEIADETCG-VVRSTVEKLYG--KEVSEAVRIQYGGSVKPETIEGLMAKENIDGALVGGASLEADSFLA-  
Streptococcus\_pneumoniae AGLTAEQ--VAASVIAYEPIWAIGTGKSASQDDAOKMCK-VVRDVVAADFG--QEVADKVRVQYGGSVKPENVASYMACPDVDGALVGGASLEAESFLA-  
Erysipelotrichaceae\_bacterium ADMCPKC--VGNMVIAYEPIWAIGTGKSASVEIAENCCR-IVRDQVRVMYG--DEAAENVRVQYGGSVKPNNIVEYMAQPDIDGALIGGASLKADSFIE-  
Lentisphaera\_araneosa ADITAEQ--MTNLVVAYEPVWAIGTGVTASPEQAQDTHA-YIRSEFAALYG--QEVADKVIQYGGSVKPANVAELMSCEDIDGALVGGASLKADDFSA-  
Chlamydomphila\_pneumoniae EQMDN----GSEFLIAYEPVWAIGTGKVAEASDVQDIHM-FCREVVAERFS--EATAEEISILYGGSVKVDNAQRFQCSDVDGLLVGGASLEGQSFFE-  
Desulfovibrio\_vulgaris ADVDATYV-PQSLVVAYEPVWAIGTGKVAGPAEVVEAHA-LVRSLEARYG--RD-GAAIRILYGGSVKPDNAAELLSLDNDVGLLVGGASLQAVSFSR-  
Mesorhizobium\_opportunistum QFFEEEVK-GATILFAYEPVWAIGDKGIPASSDYADKQ----QGLIKAVAG--SLLPSVPSVLYGGSVNPGNAAELIGQPNVDGLFTGRSAWQAQGYID-  
Bartonella\_henselae P---DGAT-AENIIIIAYEPVWAVGTGNTATSADVAEVHA-FIHhKMHSRF---GDEGAKIRLLYGGSVKPSNAFELLSTAHVNGALIGGASLKAIDFLT-  
Brucella\_abortus P---DGVT-AENTIIAYEPVWAIGTGLTPTVQDVRAAHA-FMREQLIERF---GAKGAHLRLLYGGSVKPSNAAELLGVAADVGDALVGGASLKAADFLA-  
Rhizobium\_etli P---DGAT-AENTVIAYEPIWAIGTGVTPTS GDVEKAHA-FMRAEMARF---GEEGRKMRLLYGGSVKPANAGELMGIANVDGALIGGASLKAADFLA-  
Agrobacterium\_tumefaciens P---DEAT-AENTVIAYEPVWAIGTGLTPTTQDVEAHA-FMRDELVKRF---GDAGKTMRIYGGSVKPANALELMGVENVGDALIGGASLKAADFLS-  
Rhodobacter\_sphaeroides P---DAAT-AANTVIAYEPVWAIGTGRTPTTAEIAEVHA-FLRARLAERF---SDA-EGFRLLYGGSVKPSNAAEIFAVPNVDGALVGGASLKAADFGG-  
Ruegeria\_sp P---DGVT-AENTVVAYEPVWAIGTGKVP TLDQIAEVHD-ALRADLVARF---GAAGKDLPLLYGGSVKPGNAAEIFGVSNDGALVGGASLKAADFGP-  
Bradyrhizobium\_japonicum P---DGST-AANLVVAYEPVWAIGTGLTPTVQDVEQIHG-FIREFLTSRF---SVDGAKMRILYGGSVKPSNAAELMAVKNVGALVGGASLKAADFLA-  
Rhodopseudomonas\_palustris P---DGAT-AANLVVAYEPVWAIGTGMP TTAADVEEVHG-FIRQTLTQRF---NAEGDQMRLLYGGSVKPSNARELMSVPHVNGALVGGASLKAADFLA-  
Methylobacterium\_radiotolerans P---KGAT-AADTVIAYEPVWAIGSGRTP TPRDIAEVHA-SLREMLDKLV---GDEAQKIRILYGGSVKPGNAKELLSVDNDVGDALVGGASLVAEDFLG-  
Rhodospirillum\_rubrum P---THAD-SGKVVIAYEPVWAIGTGRVPTTEDVAKVHG-ALRKDLVGL---GADNGKVRILYGGSVKPDNAAELMALENVDGALVGGASLKAEDFWA-  
Zymomonas\_mobilis P---PDAT-SDNLVVAYEPVWAIGTGNTP PPEEIAEMHA-SIRDRLCLL---GSEGGKVRILYGGSVTKNAEELMAIPDVNGTLVGGASLTAEQFVP-  
Gluconacetobacter\_hansenii P---QGFT-G---IVAYEPVWAIGSGTAASQODIADMTQ-FIREELVRQF---GDAGKTIKILYGGSVNGRNAADILPIADVGGALVGNASLAAETTFMP-  
Thermus\_thermophilus EG-VEPPG-PEALVIAYEPVWAIGTGKNATPEDAEAMHQ-EIRKALSERYG--EAFASRVRIYGGSVNPKNFADLLSMPNVDGGLVGGASLELESFLA-  
Thermus\_aquaticus KG-VEPES-PDRLVIAYEPVWAIGTGKNATPEDAEAMHQ-AIRQALAEYRG--EAFASRVRLYGGSVNPKNFADLLSMPNVDGGLVGGASLELESFLA-  
Oceanithermus\_profundus EG-VGLET-GEELVIAYEPVWAIGTGKTASADDAQAMAA-AIRGFLAEYRG--ESVAGRTRILYGGSMKPANTTEILAGPDVDGGLVGGASLEVASFSA-  
Deinococcus\_deserti EG-VG----TDVVIAYEPVWAIGTGKTATAEDAEEELAE-AIRGALTEQYG--EAAG-TLRILYGGSVKPDNIASICAKPNVNGALVGGASLKVADVVG-  
Bifidobacterium\_bifidum RD-LSDKE-AAKLIIAYEPVWAIGTGMVATPD TAQQAQK-AIRDDLGE MFG--PAVADTVRIYGGSVSSKNATHLIGEPDVGFLIGGASLDPDELAK-  
Bifidobacterium\_longum RD-LNEEQ-AAKLIVAYEPVWAIGTGMVATPQSAQDAAN-AIRNDLKTTFG--TKVSDSVRIYGGSVTSKNAAEELISQPDVDGFLIGGAALDVEELAK-  
Gardnerella\_vaginalis RD-LDSKQ-AERLIIAYEPVWAIGTGMVATAQSAQDAK-AIRDDLQETFG--DTVSKVRILYGGSVTSSNAASLICEPDVDGFLIGGASLDIEELAT-  
Nocardia\_farcinica KG-LSAEQ-IAKVVIAYEPVWAIGTGKVASAADAQEVCG-AIRAELAE LAG--PEVAAQVRVLYGGSVNAKNVGE LVAQPDVDGALVGGASLKGDEFAT-  
Mycobacterium\_tuberculosis AG-LLAEQ-IGSVVIAYEPVWAIGTGRVASAADAQEVCA-AIRKELASLAS--PRIADTVRVLYGGSVNAKNVGDIVAQDDVDGGLVGGASLDGEHFAT-  
Corynebacterium\_glutamicum AG-LDAAE-LANTVIAYEPVWAIGTGKVASAADAQEVCK-AIRGLIVELAG--DEVAEGLRILYGGSVKAETVAEIVGQPDVDGGLVGGASLDGEAFAK-  
Propionibacterium\_acnes DG-IPAEQ-VAKLVIAYEPIWAIGTGGETATADDAQEV CQ-AIREAVKELYD--APTAEAVRIQYGGSVKPANVAEIMAKPDVDGALVGGASLKAGDFSK-  
Actinomyces\_odontolyticus AG-WKPEE-VAKIVIAYEPIWAIGTGGETASAEDAQEVCG-AIRAALAE DFG--AETAESTRILYGGSAKPDNIKELMAQPDVDGGLVGGASLKADSFAA-  
Microbacterium\_testaceum EG-VAS---AAEIVVAYEPVWAIGSGQAATPEQAQEVCA-KLRVVAEKLG--ADAAARTRVLYGGSVKANNIAAFMREPDVDGALVGGASLVVDEFAA-  
Moritella\_marina NT-QGVEA-LEGAI IAYEPIWAIGTGKAATAEDAQR IHA-QIR-AHIAEKS--EAVAKNVVIQYGGSVKPENAAAYFAQPDIDGALVGGAAALDAKSFAA-  
Photobacterium\_profundum NT-QGVEA-LEGAI IAYEPIWAIGTGKAATAEDAQR IHA-QIR-AHIAEKS--EAVAKNVVIQYGGSVKPENAAAYFAQPDIDGALVGGAAALDAKSFAA-  
Vibrio\_cholerae DA-YGVEA-LNGAI IAYEPIWAIGTGKAATAEDAQR IHA-SIR-ALIAAKD--AAVAEQVIIQYGGSVKPENAAAYFAQPDIDGALVGGAAALDAKGFAA-  
Shigella\_flexneri KT-QGAAA-FEGAVIAYEPVWAIGTGKSATPAQAQAVHK-FIR-DHIAKVD--ANIAEQVIIQYGGSVNASNAAE LFAQPDIDGALVGGASLKADAFAV-  
Escherichia\_coli KT-QGAAA-FEGAVIAYEPVWAIGTGKSATPAQAQAVHK-FIR-DHIAKVD--ANIAEQVIIQYGGSVNASNAAE LFAQPDIDGALVGGASLKADAFAV-  
Salmonella\_enterica KT-QGAAA-FEGAVIAYEPVWAIGTGKSATPAQAQAVHK-FIR-DHIAKAD--AKIAEQVIIQYGGSVNASNAAE LFAQPDIDGALVGGASLKADAFAV-  
Klebsiella\_pneumoniae KT-QGAAA-FEGVVIAYEPVWAIGTGKSATPAQAQAVHK-FIR-DHIAKAD--AKIAEQVIIQYGGSVNAGNAAELFTQPDIDGALVGGASLKADAFAV-  
Enterobacter\_aerogenes KT-QGAAA-FEGVVIAYEPVWAIGTGKSATPAQAQAVHK-FIR-DHIAKAD--AKIAEQVIIQYGGSVNAGNAAELFTQPDIDGALVGGASLKADAFAV-  
Serratia\_symbiotica KT-LGAPA-MKSAVIAYEPVWAIGTGKSATPAQAQAVHK-FIR-DHIAKHD--TAIAAEVVIQYGGSVNDKNAAELFAQPDIDGALVGGASLKADAFAA-

Yersinia\_pestis NT-LGVKA-FEGAVIAYEPIWAIGTGKSATPAQAQAVHK-FIR-DHIAKQD--AAVAAQVVIQYGGSVNDKNAAEELFTQPDIDGALVGGASLKADAFVAV-  
Actinobacillus\_pleuropneumonia DA-LGVEA-FNGAVIAYEPIWAIGTGKSATPAQAQAVHA-FIR-GHIAAKS--QAVADQVVIQYGGSVNDANAAEELFTQPDIDGALVGGASLKAPAFVAV-  
Pseudomonas\_aeruginosa DE-LGVGA-FARAVVAYEPIWAIGTGLTASPAQAQEVHA-AIR-AQLAAEN--AEVAKGVRLLYGGSVKAAASAEELFGMPDIDGGLVGGASLNADDFGA-  
Marinomonas\_posidonica DV-VGIQA-FENIVIAYEPIWAIGTGLSASAQAQDVHQ-AIR-ANLASLS--TPVSEKVIQYGGSVKASTSAEELFTMPDIDGALVGGASLDKAEFLD-  
Xylella\_fastidiosa AL-VGPQG-VARGLIAYEPIWAIGTGRHADPSQVQAMHA-FIR-GEIARQD--ARIGDSLILLYGGGKPCNAAEELFSQDQVDGGLIGGASLVADDFLA-  
Xanthomonas\_campestris SL-VGSAG-FARAVVAYEPIWAIGTGRATPDQAQAVHA-FIR-GEVAKAD--ARIADSLPILYGGSVKPDNAAEELFSQDQVDGGLVGGASLVAEDFLA-  
Marinobacter\_algicola AD-VGNGL-WQOVVIAYEPIWAIGTGKTATADDAQAMHA-AIR-AVLSMLG--A-PADEVSLLYGGSVKADNAAALFAQPDIDGGLIGGASLDASDFVS-  
Aeromonas\_caviae EK-NGAMA-FDNAIAYEPIWAVGTGKCATPEQAQEVHS-FIR-SRLAEDT--PVIGEKVRIYGGSVTPANAQDLFAQSDIDGGLIGRASLDGEAFLG-  
Pseudoalteromonas\_haloplanktis EK-LGVAA-LKDSVIAYEPIWAIGTGKTASPEQAQSVHK-FIR-DKIASLN--SDLAQGLTILYGGSVNEKNESELLFAQTDIDGGLIGGASLKADSFTA-  
Legionella\_pneumophila AK--GKDC-FRDCVVAYEPIWAIGTGKTATPEQAQKIHQ-FIR-DLVGEIN--DSDAKHLTLIYGGSVNENNAKALFSMPDIDGGLVGGASLNKQFVE-  
Ralstonia\_solanacearum ES-LSLEQ-LGRIVVAYEPIWAIGTGKTATSEQAQAVHA-FLR-GRVAACD--AGVAQRMPIYGGSVKPDNAAEELFSMADIDGGLIGGASLKAEDFLV-  
Burkholderia\_sp AK-LSAQE-AARLVVAYEPIWAIGTGKSASAAQAQAVHA-FLR-ARLAAG-----AADVPLLYGGSVKPDNAAEELFRQNDIDGGLIGGASLKDQDFLA-  
Bordetella\_pertussis A--LGRDA-LVRMVLAYEPIWAIGTGRTASPEQAQEVHS-AIR-VALDGLQ-----ASQVRVLYGGSVKGANAAASLFAMPDIDGGLVGGASLVAEEFLR-  
Nitrosococcus\_watsonii QL-AGVNA-LKKAVIAYEPIWAIGTGRTATPEQAQEVHA-FIR-GHVAVQN--SGIAEELLVLYGGSVKGSNAAQLLAMPDIDGGLIGGASLNKAEFLT-  
Coxiella\_burnetii QMNDNLAS-LEGMVVAYEPIWAIGTGKNATPSQAEEVHA-ALR-DQLHRQD--ATLAESTRILYGGSVKPDNAAALFEMPNDIDGALVGGASLEAEQFLK-  
Variovorax\_paradoxus HV--NGHC-ISEIVVAYEPIWAIGTGKTASPEQAQAVHA-VLR-AQLHHA--SEHAAGISILYGGSMNAAEELLAQADIDGGLIGGASLKAPDFLQ-  
Halomonas\_elongata DG-LEAGQ-RSRLVIAYEPIWAIGTGRTATPEQAQAIHA-AIR-RRRLARYG--DGLAEGTQLLYGGSMKADNAAADLLAQPDIIDGGLVGGASLKIDDFLA-  
Tenebrio\_Molitor AKVND---WSNVVIAYEPIWAIGTGKTATPQQAQDVHK-ALRQWICENIDA--KVGNSIRIQYGGSVTAANCKELASQPDIDGFLVGGASLK-PEFVD-  
Bombyx\_mori SAIGDK---WENIVLAYEPIWAIGTGKTATPQQAQDVHH-ALRNWLSANVSG--SVSDAVRIQYGGSVTAANAKELASCKDIDGFLVGGASLK-PEFVE-  
Apis\_mellifera NKINS---WDNVVAYEPIWAIGTGKTATPQQAQEVHE-KLRNWFTEVNSA--DVSAGAIRIQYGGSVTAANCRELAAKPDIDGFLVGGASLK-PEFIQ-  
Aedes\_aegypti DKVKD---WSNVVIAYEPIWAIGTGKTATPEQAQEVHA-ALRKWFTEVNSA--DVSAGAIRIQYGGSVTAANCRELAAKPDIDGFLVGGASLK-PEFIQ-  
Anopheles\_gambiae AQVKD---WSNVVIAYEPIWAIGTGKTATPEQAQEVHA-ALRKWFTEVNSA--DVSAGAIRIQYGGSVTAANCRELAAKPDIDGFLVGGASLK-PEFIQ-  
Drosophila\_melanogaster QKIKD---WKNVVVAYEPIWAIGTGQTATPDQAQEVHA-FLRQWLSDNISK--EVSASLRIQYGGSVTAANAKELAKKPDIDGFLVGGASLK-PEFVD-  
Rhipicephalus\_microplus SNVKD---WSKVVIAYEPIWAIGTGKTATPDQAQEVHS-KVRNWLSTNVSA--DVASKVRIQYGGSVNAGNCKELGRKPDIDGFLVGGASLK-PEFVQ-  
Ixodes\_scapularis AKVTD---WNRVVLAYEPIWAIGTGKTASPEQA-EVHA-QLRQWLSKNVSP--DVAKKVRIQYGGSVTAANCQELAKKPDVDGFLVGGASLK-PEFVE-  
Anolis\_carolinensis DNVKD---WSKVVLAYEPIWAIGTGKTATPQQAQEVHL-KLRGWLKSHVSD--AVSQSTRIIYGGSVTGATAKELASQPDLDGFLVGGASLK-PEFVD-  
Gallus\_gallus DNVKD---WSKVVLAYEPIWAIGTGKTATPQQAQEVHE-KLRGWLKSHVSD--AVAQSTRIIYGGSVTGATCKELASQHDVDGFLVGGASLK-PEFVD-  
Orcinus\_orca DNVKD---WGVVVLAYEPIWAIGTGKTATPQQAQEVHE-KLRGWLKSNVSD--AVAQSTRIIYGGSVTGATCKELASQPDVDGFLVGGASLK-PEFVD-  
Bos\_taurus DNVKD---WSKVVLAYEPIWAIGTGKTATPQQAQEVHE-KLRGWLKSNVSD--AVAQSTRIIYGGSVTGATCKELASQPDVDGFLVGGASLK-PEFVD-  
Canis\_lupusfamiliaris DNVKD---WSKVVLAYEPIWAIGTGKTATPQQAQEVHE-KLRGWLKSNVSD--AVAQSTRIIYGGSVTGATCKELASQPDVDGFLVGGASLK-PEFVD-  
Odobenus\_rosmarus DNVKD---WSKVVLAYEPIWAIGTGKTATPQQAQEVHE-KLRGWLKSNVSD--AVAQSTRIIYGGSVTGATCKELASQPDVDGFLVGGASLK-PEFVD-  
Oryctolagus\_cuniculus DNVKD---WSKVVLAYEPIWAIGTGKTATPQQAQEVHE-KLRGWLKSNVSD--AVAQSTRIIYGGSVTGATCKELASQPDVDGFLVGGASLK-PEFVD-  
Nomascus\_leucogenys DNVKD---WSKVVLAYEPIWAIGTGKTATPQQAQEVHE-KLRGWLKSNVSD--AVAQSTRIIYGGSVTGATCKELASQPDVDGFLVGGASLK-PEFVD-  
Pan\_troglodytes DNVKD---WSKVVLAYEPIWAIGTGKTATPQQAQEVHE-KLRGWLKSNVSD--AVAQSTRIIYGGSVTGATCKELASQPDVDGFLVGGASLK-PEFVD-  
Homo\_sapiens DNVKD---WSKVVLAYEPIWAIGTGKTATPQQAQEVHE-KLRGWLKSNVSD--AVAQSTRIIYGGSVTGATCKELASQPDVDGFLVGGASLK-PEFVD-  
Pongo\_abelii DNVKD---WSKVVLAYEPIWAIGTGKTATPQQAQEVHE-KLRGWLKSNVSD--AVAQSTRIIYGGSVTGATCKELASQPDVDGFLVGGASLK-PEFVD-  
Macaca\_mulatta DNVKD---WSKVVLAYEPIWAIGTGKTATPQQAQEVHE-KLRGWLKSNVSE--AVAQSTRIIYGGSVTGATCKELASQPDVDGFLVGGASLK-PEFVD-  
Ochotona\_princeps DNVKD---WSKVVLAYEPIWAIGTGKTATPQQAQEVHE-KLRGWLKSNVSD--AVAQSTRIIYGGSVTGATCKELASQADVDGFLVGGASLK-PEFVD-  
Sus\_scrofa DNVKD---WNVVVLAYEPIWAIGTGKTATPQQAQEVHE-KLRGWLKTHVPE--AVAHSTRIIYGGSVTGATCKELASQPDVDGFRVSGASLK-PEFVD-  
Mus\_musculus DNVKD---WSKVVLAYEPIWAIGTGKTATPQQAQEVHE-KLRGWLKSNVND--GVAQSTRIIYGGSVTGATCKELATPADVDGFLVGGASLK-PEFVD-  
Rattus\_norvegicus DNVKD---WCKVVLAYEPIWAIGTGKTATPQQAQEVHE-KLRGWLKCNVSE--GVAQSTRIIYGGSVTGATCKELASQPDVDGFLVGGASLK-PEFVD-  
Xenopus\_laevis DNVKD---WSKVVLAYEPIWAIGTGKTATPEQAQEVHK-KLREWVKTNVSE--GVAQSVRIYGGSVTGGTCRELAGQPDIDGFLVGGASLK-PEFIE-  
Xenopus\_tropicalis DNVKD---WSKVVLAYEPIWAIGTGKTATPEQAQEVHK-KLREWVKTNVSE--DVAKSVRIYGGSVTGGTCKELGAQPDIDGFLVGGASLK-PEFID-  
Danio\_rerio DNVKD---WSKVVLAYEPIWAIGTGKTASPEQAQEVHD-KLRQWLKTNVSE--AVANSVRIYGGSVTGGTCKELASQKDLGFLVGGASLK-PEFID-  
Ictalurus\_punctatus DNVKD---WSKVVVAYEPIWAIGTGKTASPEQAQEVHD-KLRQWMSANISE--AVANSVRIYGGSVTGGTCKELASQKDVVDGFLVGGASLK-PEFID-  
Oreochromis\_niloticus DNVKD---WSKVVLAYEPIWAIGTGKTASPEQAQEVHD-KLREWVKTNVSE--AVANSVRIYGGSVTGGTCKELASQKDVVDGFLVGGASLK-PEFID-

Nematostella\_vectensis DKIS---DWSKVVIAYEPVWAIGTGKTATPQQAQEVHN-QLRAWLKENVSV--DVAESTRIIYGGSVNAKNCRELAAEGDIDGFLVGGASLK-PEFVQ-  
 Schistosoma\_mansoni NKIKSAD-EWKRVVYAYEPVWAIGTGKVATPQQAQEVHN-FLRKWFKTNAPN--GVDEKIRIYGGSVTAAKCKELAQHQDVGFLVGGASLK-PEFTE-  
 Strongylocentrotus\_purpuratus DVITD---WGNVVIAYEPVWAIGTGKTATPQQAQEVHQ-NLRSWLTKVHVA--AVANTRIVYGGSVNNGNCCDYGQPDVDFVGGASLK-PEFKQ-  
 Caenorhabditis\_elegans DKGVS---WENIVVIAYEPVWAIGTGKTASPEQAQEVHE-WIRAFLEKESVSP--AVADATRIIYGGSVTADNAAELGKKPDIDGFLVGGASLK-PDFVK-  
 Caenorhabditis\_remanei DKGVS---WENIVVIAYEPVWAIGTGKTASPEQAQEVHE-WIRAFLEKESVSP--AVADATRIIYGGSVTADNAAELGKKADIDGFLVGGASLK-PDFVK-  
 Brugia\_malayi DKKAN---WKNIVVIAYEPVWAIGTGKTASPEQAQEVHG-WIREFLKEKVSAA--DVAQKTRIIYGGSVTAEENAAELAKKPDIDGFLVGGASLK-PDFIK-  
 Trichinella\_spiralis KYKLD---WNNIVVIAYEPVWAIGTGKTASPEQAQEVHV-WIRDWLKQNVSA--DAAAKCRIIYGGSVTGDNCRALGKQSDIDGFLVGGASLK-PEFLK-  
 Ricinus\_communis ERVKD---WADVVLAYEPVWAIGTGKVATPQAQEVHF-ELRKWLKENTSS--QVAATRIIYGGSVTATNCKELAAQPDVDFVGGASLK-PEFIE-  
 Vitis\_vinifera DKVSN---WANVVLAYEPVWAIGTGKVATPQAQEVHS-ELRNWFQANASP--EVAATRIIYGGSVGANCKELAAKPDVDFVGGASLK-PEFID-  
 Arabidopsis\_thaliana DRVTN---WSNVVIAYEPVWAIGTGKVASPAQAQEVHD-ELRKWLAKNVSA--DVAATRIIYGGSVNNGNCKELGGQADVDFVGGASLK-PEFID-  
 Zea\_mays EKIKD---WSNVVYAYEPVWAIGTGKVATPQAQEVHA-SLRDWLKTNASP--EVAESTRIIYGGSVTAAKCKELAAQPDVDFVGGASLK-PEFID-  
 Oryza\_sativa ERIKD---WTNVVYAYEPVWAIGTGKVATPDQAQEVHD-GLRKWLAANVSA--EVAESTRIIYGGSVTGANCKELAAKPDVDFVGGASLK-PEFID-  
 Fragaria\_vesca EKVKD---WTNIVLAYEPVWAIGTGKVASPAQAQEVHC-ELRKWLHANTSP--EVAESTRIIYGGSVNGANSKELAGQPDLDGFLVGGASLK-PEFID-  
 Glycine\_max AKISN---WDNVVLAYEPVWAIGTGKVATPQAQEVHA-DLRKWVHDNVSA--EVAASVRIIYGGSVNNGNCKELAAQPDVDFVGGASLK-AEFVD-  
 Cucumis\_sativus EKISN---WDNVVLAYEPVWAIGTGKVATPQAQEVHA-ELRKWFQNNVSA--EVAASVRIIYGGSVNNGNCKELAAQPDLDGFLVGGASLK-VNSSY-  
 Perkinsus\_marinus PVVKD---WNNIVVIAYEPVWAIGTGKVATTEQAQEVHA-SIRAYLKSQVST--EVAENTRIIYGGSVNPNCGELIKCADVDFVGGASLK-PQFTE-  
 Aspergillus\_niger KELTK-E-QWAKVVIAYEPVWAIGTGKVATTAQAQEVHA-AIRKWLVDALSA--EAADNTRIIYGGSVSEKNCRDLAKEADVDFVGGASLK-PAFVD-  
 Penicillium\_chrysogenum KELSA-E-QWAKVVIAYEPVWAIGTGKVATTEQAQEVHA-AIRKWLGEALSA--QAQENVRVIYGGSVSEKNCRELATQPDVDFVGGASLK-PAFVD-  
 Paracoccidioides\_brasiliensis EEVSP-A-EWNVVYAYEPIWAIGTGKVATTEQAQEVHA-SIRKWLNEKISP--EAAENIRVIYGGSVTENNCRDLAQPDVDFVGGASLK-PAFVD-  
 Schizosaccharomyces\_pombe DKV---Q-NWSKIVVIAYEPVWAIGTGKTATPEQAQEVHA-EIRKWATNKLGA--SVAEGLRVIYGGSVNNGNCKEFLKFHDIDGFLVGGASLK-PEFHN-  
 Saccharomyces\_cerevisiae EEVKD---DWTNVVYAYEPVWAIGTGLAATPEDAQDIHA-SIRKFLASKLGD--KAASELRILYGGSVANGSNNAVTFKDKADVDFVGGASLK-PEFVD-  
 Kluyveromyces\_lactis EKVQ---DWTNVVYAYEPVWAIGTGLAATPEDAQDIHA-SIRKFLASKLGD--KAASELRILYGGSVANGSNNAVTFKDKADVDFVGGASLK-PEFVD-  
 Candida\_dubliniensis KIVS---DWTNIVVYAYEPVWAIGTGLAATPDDAEEETHK-GIRAHLLAKTIGA--EQAQKTRIIYGGSVNGKNAKDFKDKANVDFVGGASLK-PEFVD-  
 Clavispora\_lusitaniae KIVS---DWTNIVVYAYEPVWAIGTGLAATPDDAEEETHK-GIRAHLLAKTIGA--EQAQKTRIIYGGSVNGKNAPEFKDKADVDFVGGASLK-PEFVD-  
 Chlamydomonas\_reinhardtii D-EVKD---WTKVVLAYEPVWAIGTGCVASPEQAQEVHA-YLRQYCAKKLGA--AVADKLRIIYGGSVSDTNCKDLKQEDIDGFLVGGASLKGAAFVT-  
 Volvox\_carteri D-EVKD---WSKVVIAYEPVWAIGTGCVATPEQAQEVHA-YLRRFCQSKLGT--SVADQLRIIYGGSVNDANCKELSVQEDIDGFLVGGASLKGSFVVT-  
 Dictyostelium\_fasciculatum NGVSD---WSKVVIAYEPVWAIGTGKTASPEQAQEVHA-FIRKWLSEKVS--EVANATRILYGGSVTATNSAELSKQLDVGFLVGGASLVASDFVT-  
 Entamoeba\_histolytica NAISK-E-AWKNIILAYEPVWAIGTGKTATPDQAQEVHQ-YIRKWMTEENISK--EVAEATRIYGGSVNPNANCNELAKKADIDGFLVGGASLDAKFKT-  
 Cryptosporidium\_parvum KDVS--D--LSNLVIAYEPIWAIGTGCVATPGQAQEAHA-FIREYVTRMYP--QVSSNLRIIYGGSVTPDNCNELIKCADIDGFLVGGASLK-PTFA--  
 Cryptosporidium\_muris KKVS--D--LSNIVVIAYEPIWAIGTGCVATPEQAQEAHE-FIRKCLLMYNN--NVSSSTRIIYGGSVNPNENCNELINCADIDGFLVGGASLK-PSFV--  
 Plasmodium\_falciparum DLID--N--FDNVILAYEPLWAIGTGKTATPEQAQVLVHK-EIRKIVKDTGCE--KQANQIRILYGGSVNTENCSSLIQOEDIDGFLVGNASLK-ESFV--  
 Plasmodium\_vivax HLID--N--FDNVVLAYEPIWAIGTGKTATPEQAQEVHK-EIRNIVKEKCGE--KNaNQIRILYGGSVNTDNCASLIKQEDIDGFLVGNASLK-SSFV--  
 Paramecium\_tetraurelia KELT--TALWSKVVIAYEPVWAIGTGRTATPEQAQEVHA-FIRGWLKSIQGT--QAQATRIIYGGSVTEKNAADLIKQPDLDGFLVGGAAALK-PGFA--  
 Tetrahymena\_thermophila GKLN--EAQWEKIVVIAYEPVWAIGTGKVATPQAQEVHE-FIRSYLTQKVSQ--NVSQKTRIIYGGSVTEKNAGELIHQKDIDGFLVGGASLK-PAFA--  
 Toxoplasma\_gondii PKIS--D--WDRVVIAYEPVWAIGTGKVATPQAQEVHE-HIREFLKAKVSE--DVANKVRIVYGGSVNASNSTELIQPDLDGFLVGGASLK-KDFL--  
 Trypanosoma\_brucei KKL--KKADWAKVVIAYEPVWAIGTGKVATPQAQEAHA-LIRSWVSSKIGA--DVAGELRILYGGSVNGKNARTLYQQRDVNGFLVGGASLK-PEFV--  
 Trypanosoma\_cruzi QKL--SKEAWAHVVIAYEPVWAIGTGKVATPQAQEVHE-LLRRWVRSKLGAA--DIAAQLRILYGGSVTAKNARTLYQMRDINGFLVGGASLK-PEFV--  
 Leishmania\_mexicana AKL--TKDANQVVLAYEPVWAIGTGKVATPEQAQEVHL-LLRKWVSENIQT--DVAAKLRILYGGSVNAANAATLYAKPDINGFLVGGASLK-PEFR--  
 Leishmania\_donovani TKL--PKEAWDQIVLAYEPVWAIGTGKVATPEQAQEVHA-LLRKWVSEKIGA--DVAARLRILYGGSVSANGNAKTYLMPKPDINGFLVGGASLK-PEFR--  
 Giardia\_lamblia KELGESKMLWKEVVIAYEPVWSIGTGCVATPEQAQEVHV-GLRKWFAEKVCA--EQAQHIRIYGGSVSANGSNCKELGQCPNIDGFLVGGASLK-PEFMTM  
 Trichomonas\_vaginalis PAIPAG--KWDDVVIAYEPIWAIGTGKVASTQDAQEMCK-VIRDILAAKVGAA--DIANKVRILYGGSVKPNNCNELAACPDVDFVGGASLE-PGFIN-  
 Sphingobacterium\_sp FHLASD--FSKIILAYEPVWAIGTGLTASPEQAQEVHA-FIRKQIEAKYGA--AVADETSVLYGGSCNPKNAPDLFSQPDIDGGLIGGASLKSDFD-  
 Pedobacter\_saltans FHLAED--FSKLVIAYEPVWAIGTGVTASSAQAQEIHA-FIRSEVAKYGA--EVAENTTILYGGSCNPNAAELFAQKDIDGGLIGGASLKSDFVD-  
 Marivirga\_tractuosa FHLTPEQ--FKNIVVIAYEPIWAIGTGKTASSQAQDMHK-TIREHIAAKFGQ--DAANKTSILYGGSCPKPNAKELFSQPDVDFVGGASLKSDFD-  
 Cyclobacterium\_marinum FGFSEEE--IKKLVIAYEPIWAIGTGKTASSEQAQDMHA-AIRKHLSSKYGE--AVAEESILYGGSCPKPSNAKELFSQPDVDFVGGASLKSDFVD-  
 Leadbetterella\_byssophila FHLSEA--IQQVVIAYEPIWAIGTGVTASSDQAQEMHK-VLRDHLASKYGA--AVAEESILYGGSVNAGNAEELFSQPDVDFVGGASLKSDFD-

```

Haliscomenobacter_hydrossis      FHLSPEE--FQKVVIAYEPIWAIGTGRTASPEQAQDMHA-AIRALLTDQYGA--EIADATTILYGGSVNGGNAAVLFSQPDVDGGLVGGASLKAEEFIT-
Parabacteroides_distasonis      FDLSEAED--FGKIILAYEPVWAIGTGKTASAEQAEEIHA-HIRATLAAKYGN--EVADNCTILYGGSCNAGNAKELFAKPNVDGGLIGGASLAVDKFMP-
Bacteroides_fragilis            FDLSEAED--FSKIVLAYEPVWAIGTGKTASPAQAQEIHA-FIRSAVAEKYQK--EIADNTSILYGGSCKPSNAKELFANPDVDGGLIGGAAALKVADFKG-
Prevotella_ruminicola          FNLSEED--FRKIVIAIYEPVWAIGTGKTATAEQAEIHA-YIRSIIAEKYQ--AVADDTTILYGGSCKASNAPELFAKPDIDGGLIGGASLKAADFQK-
Alistipes_shahii                YNLTEEQ--YKNLVIAIYEPVWAIGTGKTASAEQAQEIHA-YIRQVLTAKFG---AAAQETAILYGGSCKPSNAAEIFAKEDVDGGLIGGAALKAEDFLA-
Porphyromonas_asaccharolytica  GHLSHEQ--MEQIVIAIYEPVWAIGTGLTATPDQAQEMHQ-HIRQTVASLFDQ--KLADLTITILYGGSCKASNAESLFSQPDVDGGLIGGAALKADTFLP-
Cellulophaga_lytica            FNLKPEA--WSNIVLAYEPVWAIGTGGETASPEQAQEMHA-FIRKTIADDEYTT--EIAEAVSILYGGSVKAPANAREIFSKADVVDGGLIGGAALKADDFIA-
Kordia_algicida                FHLDTAA--WKNIVLAYEPVWAIGTGGETASPEQAQEMHA-FIRKTVSEKFGD--ETGNGVSILYGGSVKAPANAAEIFAKEDVDGGLIGGASLKAADFVA-
Flavobacterium_psychrophilum   FHIDKSA--WANIILAYEPVWAIGTGGETASPEQAQEMHE-FIRETVRKVFGS--DIAEDVSILYGGSVKPDNAKEIFSKPDVDGGLIGGAALKADDFV-
Neisseria_gonorrhoeae          QGLDTKN--IA---VAYEPVWAIGTGKVVATVEQIADMHA-FIYKEILSLCGS---DVK-IRVLYGGSVKADNAADIFAVPYVDGALVGGASLSYDSFTA-
Francisella_tularensis        ENLSVEQ--LAKVVIAYEPVWAIGTGCVASLEQIQETHQ-FIRSLAKVDER---LAKNIKIVYGGSLKAENAKDILSLPDVDGGLIGGASLKAEEFNE-
Mycoplasma_genitalium          DTIDKSL--IKNLVIAIYEPVWAIGTGKTATPEVANQTIK-TIREYINDLYDE--NVANNISILYGGSVDHNNIQKLAIMEQIDGFLVKGASLEIKNFLE-
Ureaplasma_urealyticum        VINYKG---LKKIIIIAYEPIWAIGTNLTLDLKHINMIE-GIKTYLYNCTGL--N----IPILYGGSVNANNIKELCTQKLDIGFLIGNASLDVNNFNQ-
Ureaplasma_parvum             IINYKG---LKKIIIIAYEPIWAIGTDLELDFKHINMIE-GIKTYLYNCTGI--N----IPILYGGSVNDNNINELCNQKLDIGFLIGNASLDVNVFNK-
Buchnera_aphidicola           ILKNLGTSAFKNIIIIAYEPIWAIGTGVSADPEHVQLIHV-FIKNYILKYSSI--NR-NDIIIQYGGVINHTNVKFFIEQPDINGLLIGNSSLSAKEFLE-
Campylobacter_jejuni          IDLNYEK-----LIIAYEPIYSIGTGVSQAQSTDIQVLE-FLASLT-----KAPLLYGGSVNENNIKEILSVNHCGGVLIGSAALKVENFIK-
Helicobacter_pylori           IDLNYSN-----LIVAYEPIWAIGTKKSASLEDIYLTHG-FLKQILN-----QKTPLLYGGSVNIQNAKEILGIDSVDGLLIGSASWELENFKT-
Orientia_tsutsugamushi        ISFSFTKN---VIIAYEPIWSIGSDMIPTIDDIYEVVT-MIREIQNRYIPH--NIENSVKIVYGGSVSANNIHQILTAG-VDGVLIGKASLKLESITT-
Wolbachia_sp                 R-LPTHGE---YTVAYEPIWAIGTGHVPPNDAIAKVIE-VIKLCTS-----KKHIIYGGSVSSENIENLLNISNLGVLIGSASLDFDHFYK-
Methanocaldococcus_Jannaschii  -----IAVEPPELIGTGIPVSKANPEVVEG-----TVRAVK--EINKDVKVLGCGAGISKGEDVKAALDLGAEGVLLASGVVKAKNVEE-
Methanococcus_voltae          -----IAVEPPELIGSGIPVSKANPEVVEG-----TVSAVH--DINKDVKVLGCGAGISKGEDVKSALDELGAEGVLLASGVVKAADVEQ-
Methanothermococcus_okinawensi -----IAIEPPELIGTGIPVSKANPEVVEG-----TVKEVR--KINKDVKILGCGAGISTGEDVSSALELGAEGVLLASGVVKAADVEG-
Pyrococcus_Woesei            -----VAVEPPELIGTGIPVSKAKPEVITN-----TVELVK--KVNPEVKVLCGAGISTGEDVKKAIELGTVGVLLASGVTKAKDPEK-
Pyrococcus_furiosus          -----VAVEPPELIGTGIPVSKAKPEVITN-----TVELVK--KVNPEVKVLCGAGISTGEDVKKAIELGTVGVLLASGVTKAKDPEK-
Thermofilum_pondans          -----VAIEPPELIGTGIPVSKAKPEVITS-----SVELVK--KVNPNVKVLCGAGITVGEDVAAAALRLGTVGVLLASGVVKAADWEK-
Methanothermobacter_thermautot -----VAVEPPELIGSGIPVSRAPPEVITG-----SVDVAVK--KVNPEVSVLCGAGISTGDDMKAAVDLGAEGVLLASGIILADSPRD-
Methanosaeta_thermophila      -----VAVEPPELIGSGIPVSKADPEVVRG-----SVEAVR--AIEKDVGVLCGAGITHGDDLRAAIELGAVGVLLASGIVKAKDQRK-
Natronobacterium_gregoryi     -----VAVEPPELIGTGTPVSQADPGVVEN-----AVVAAE--NVDDDVSVLCGAGISTGEDVTAADDLGTGEGVLLASGVAKADNPRA-
Halobacterium_salinarum       -----VAVEPPALIGTGTPVSQADPDIVSD-----AVAAA--AVDPSVDVYCGAGITTEDVVSAGDLGASGVLLASGVAKADDPRA-
Halogeometricum_borinquense   -----VAVEPPELIGGDDSVATADPDIVRD-----AVEAAA--NVDESVEVFCGAGISSGDDVDAAGDLGATGILLASGVAKADDPRA-
Methanosphaerula_palustris    -----VAIEPPELIGSGVSVAKADPGIQR-----SVAAVH--AVNPKVKVLTGAGIQSGECVKIARDLGTGTVLLASSVVKVEDPAI-
Thermoproteus_tenax           -----VAVEPPELIGTGRAVSRKPEAIVE-----TVGLVS--RHFPEVSVITGAGIESGDDVAAAALRLGTRGVLLASAAVKAADPYA-
Pyrobaculum_islandicum        -----VAVEPPELIGTGKAVSKYKPEITIE-----TVRLVT--KHFPEVSVITGAGIETGEDVEAALKLGTGKGVLLASAAVKAADHYQ-
Cenarchaeum_symbiosum        -----IAIEPPELIGSGRSVSSERPELIGE-----AAEAIR--GADG-TKLLCGAGITSGADVRAKALELGSKGILVASGVVKSDDPAA-
Nitrosopumilus_maritimus      -----IAIEPPELIGSGKAVSTERPELITK-----AANAVK--SANNTKLLCGAGIVSGQDVSKAVELGSKGILVASGIKAKNWDK-
Desulfurococcus_kamchatkensis  -----VAVEPPELIGTGVSVSKAKPEVITN-----SVMIR--RVNKDVAILTGAGITTEDAYIAVKLGTIGVLVASGIVKADPYQ-
Pyrolobus_fumariorum         -----VAVEPPELIGTGIAVSRAPPEVITK-----AVESVT--RVSPNVPVVLVAGIVSREDARRSVELGARGVLVASAVMKAADPYA-
Acidilobus_saccharovorans     -----IAIEPPELIGTGVSVSKARPEVITE-----GVKAVK--AVA-DIPVLAGAGITTYREDVVRVAVQLGASGILLASAVMKAADPK-
Sulfolobus_islandicus         -----ILIEPPELIGTGISVSKAKPEVITK-----AVDEIR--KSE-GIYLIAGAGITTEDVYKALKLGAHIGVASAVMKAKEPEK-
Clustal Consensus              .  **      :*                               :  *.  .                               *  :.  .

```

```

.....|.....|.....|.....|
Roseiflexus_castenholzii  --IVHFLSPQE-----
Chloroflexus_aurantiacus  --IIHYQ-----
Nostoc_punctiforme       --IVNFHLV-----
Anabaena_variabilis      --IVNYQ-----
Synechocystis_sp         --IVNFQP-----
Cyanobacterium_aponinum  --LVNYQ-----
Crocospaera_watsonii     --IINYQ-----
Trichodesmium_erythraeum --LVNYQ-----
Synechococcus_sp         --LANYQDQ-----
Prochlorococcus_marinus  --ISNYKVE-----
Sphaerobacter_thermophilus --IVERAAALRL-----
Anaerolinea_thermophila  --IVQAAAEAKA-----
Myxococcus_xanthus       --IVKAAT-----
Collinsella_tanakaei     --MVVKSAE-----
Atopobium_vaginae        --MVKAAM-----
Eggerthella_sp           --LVKAACL-----
Dictyoglomus_thermophilum --IVKS-----
Aquifex_aeolicus         --IVYSF-----
Thermodesulfobivibrio_yellowston --IVKY-----
Dehalogenimonas_lykanthroporep --IVRKS--VQS-----
Dehalococcoides_sp       --ICRQAAVIQNKH-----
Geobacter_metallireducens --IVNYKA-----
Desulfobacter_postgatei  --IIRF-----
Planctomyces_brasiliensis --IIDAGVELSA-----
Spirochaeta_coccoides    --IIEFGL-----
Denitrovibrio_acetiphilus --LVNFNG-----
Prosthecochloris_aestuarii --IVKAAEKS-----
Chlorobium_phaeobacteroides --IVNAAG-----
Chlorobium_ferroxidans    --IIKAAS-----
Chloroherpeton_thalassium --IIKSAE-----
Treponema_pallidum       --IARSV-----
Leptospira_interrogans   --LF-----
Borrelia_turicatae       --IVNKVAK-----
Thermotoga_maritima      --LARIMRGVIS-----
Fusobacterium_nucleatum  --IIKAGN-----
Selenomonas_sputigena    --IVKF-----
Ruminococcus_sp          --IVNYK-----
Clostridium_botulinum    --IVNY-----
Clostridium_perfringens  --IVNY-----
Thermoanaerobacter_wiegelii --IVNY-----
Brachyspira_murdochii    --IVNYIAK-----
Acholeplasma_laidlawii   --FTKAANK-----
Lactobacillus_reuteri    --MVNYLKNDQEK-----
Bacillus_subtilis        --LLEEGQYE-----

```



|                                |                      |
|--------------------------------|----------------------|
| Bacillus_thuringiensis         | --LLGAVK-----        |
| Listeria_monocytogenes         | --LLEAVK-----        |
| Geobacillus_stearothermophilus | --LVEAGRHE-----      |
| Staphylococcus_aureus          | --LLEGAK-----        |
| Enterococcus_faecalis          | --LLDAVK-----        |
| Lactococcus_lactis             | --LLEMYK-----        |
| Streptococcus_pneumoniae       | --LLDFVK-----        |
| Erysipelotrichaceae_bacterium  | --IIEKTK-----        |
| Lentisphaera_araneosa          | --LILNAAALS-----     |
| Chlamydomphila_pneumoniae      | --VAKNFNV-----       |
| Desulfovibrio_vulgaris         | --IILA-----          |
| Mesorhizobium_opportunistum    | --ILGRASAAI-----     |
| Bartonella_henselae            | --ICDVYRKL-----      |
| Brucella_abortus               | --ICETYRNL-----      |
| Rhizobium_etli                 | --IYRAYEALLA-----    |
| Agrobacterium_tumefaciens      | --IYAAYEQLTA-----    |
| Rhodobacter_sphaeroides        | --IVAALSAA-----      |
| Ruegeria_sp                    | --IIAALAAS-----      |
| Bradyrhizobium_japonicum       | --IAKGCP-----        |
| Rhodopseudomonas_palustris     | --IAAGCP-----        |
| Methylobacterium_radiotolerans | --ICAAYA-----        |
| Rhodospirillum_rubrum          | --IAQSCA-----        |
| Zymomonas_mobilis              | --IIEAGGRLA-----     |
| Gluconacetobacter_hansenii     | --IVRAAVDI-----      |
| Thermus_thermophilus           | --LLRIAG-----        |
| Thermus_aquaticus              | --LLRMAG-----        |
| Oceanithermus_profundus        | --MVEAAG-----        |
| Deinococcus_deserti            | --MNDALK-----        |
| Bifidobacterium_bifidum        | --IARLTLKATRR-----   |
| Bifidobacterium_longum         | --IARLALKSTKSRN----- |
| Gardnerella_vaginalis          | --IVQLSSYKNRI-----   |
| Nocardia_farcinica             | --LSAIAAGGPLP-----   |
| Mycobacterium_tuberculosis     | --LAAIAAGGPLP-----   |
| Corynebacterium_glutamicum     | --LAANAASVA-----     |
| Propionibacterium_acnes        | --IVTFYEA-----       |
| Actinomyces_odontolyticus      | --MATFYA-----        |
| Microbacterium_testaceum       | --IIRYQKHVGV-----    |
| Moritella_marina               | --IAKAAAEAKA-----    |
| Photobacterium_profundum       | --IAKAAAEAKA-----    |
| Vibrio_cholerae                | --IAKAAAEAKKA-----   |
| Shigella_flexneri              | --IVKAAEAAKQA-----   |
| Escherichia_coli               | --IVKAAEAAKQA-----   |
| Salmonella_enterica            | --IVKAAEAAKQA-----   |
| Klebsiella_pneumoniae          | --IVKAAEAAKKA-----   |
| Enterobacter_aerogenes         | --IVKAAEAAKKA-----   |
| Serratia_symbiotica            | --IVKAAGAACKA-----   |

|                                |                     |
|--------------------------------|---------------------|
| Yersinia_pestis                | --IVKAAAKAKKA-----  |
| Actinobacillus_pleuropneumonia | --IVKAAEKAKA-----   |
| Pseudomonas_aeruginosa         | --ICRAAGS-----      |
| Marinomonas_posidonica         | --IVKAAG-----       |
| Xylella_fastidiosa             | --IARATV-----       |
| Xanthomonas_campestris         | --IARAAAAC-----     |
| Marinobacter_algicola          | --ICRAVPGKS-----    |
| Aeromonas_caviae               | --IVEAAKGAS-----    |
| Pseudoalteromonas_haloplanktis | --ICNSAKGTV-----    |
| Legionella_pneumophila         | --IVKGIN-----       |
| Ralstonia_solanacearum         | --IGRA-----         |
| Burkholderia_sp                | --ICKAAAATTVAD----- |
| Bordetella_pertussis           | --IAAA-----         |
| Nitrosococcus_watsonii         | --ICQAAV-----       |
| Coxiella_burnetii              | --IGQQCNQSF-----    |
| Variovorax_paradoxus           | --IISATAR-----      |
| Halomonas_elongata             | --ICQSAG-----       |
| Tenebrio_Molitor               | --IINARQL-----      |
| Bombyx_mori                    | --IVNANQ-----       |
| Apis_mellifera                 | --IVNAKQ-----       |
| Aedes_aegypti                  | --IVNARQ-----       |
| Anopheles_gambiae              | --IVNARQ-----       |
| Drosophila_melanogaster        | --IINARQ-----       |
| Rhipicephalus_microplus        | --IINAMQG-----      |
| Ixodes_scapularis              | --IINARQ-----       |
| Anolis_carolinensis            | --IINAKH-----       |
| Gallus_gallus                  | --IINAKH-----       |
| Orcinus_orca                   | --IINAK-----        |
| Bos_taurus                     | --IINAKQ-----       |
| Canis_lupusfamiliaris          | --IINAKQ-----       |
| Odobenus_rosmarus              | --IINAKQ-----       |
| Oryctolagus_cuniculus          | --IINAKQ-----       |
| Nomascus_leucogenys            | --IINAKQ-----       |
| Pan_troglodytes                | --IINAKQ-----       |
| Homo_sapiens                   | --IINAKQ-----       |
| Pongo_abelii                   | --IINAKQ-----       |
| Macaca_mulatta                 | --IINAKQ-----       |
| Ochotona_princeps              | --IINAKQ-----       |
| Sus_scrofa                     | --IINAK-----        |
| Mus_musculus                   | --IINAKQ-----       |
| Rattus_norvegicus              | --IINAKQ-----       |
| Xenopus_laevis                 | --IINAKH-----       |
| Xenopus_tropicalis             | --IINAKQ-----       |
| Danio_rerio                    | --IINAKA-----       |
| Ictalurus_punctatus            | --IINAKV-----       |
| Oreochromis_niloticus          | --IINAKA-----       |

|                               |                    |
|-------------------------------|--------------------|
| Nematostella_vectensis        | --IVNARL-----      |
| Schistosoma_mansoni           | --ICKARQR-----     |
| Strongylocentrotus_purpuratus | --IIAAGSA-----     |
| Caenorhabditis_elegans        | --IINARS-----      |
| Caenorhabditis_remanei        | --IINARS-----      |
| Brugia_malayi                 | --IIHARD-----      |
| Trichinella_spiralis          | --IIEARSN-----     |
| Ricinus_communis              | --IIKSAEVKKS-----  |
| Vitis_vinifera                | --IIKSAEVKKN-----  |
| Arabidopsis_thaliana          | --IIKAAEVKKS-----  |
| Zea_mays                      | --IINAATVKSA-----  |
| Oryza_sativa                  | --IINSATVKSA-----  |
| Fragaria_vesca                | --IINAADVKK-----   |
| Glycine_max                   | --IINAATVKK-----   |
| Cucumis_sativus               | --KFASFVHFLFG----- |
| Perkinsus_marinus             | --IIAAAQSA-----    |
| Aspergillus_niger             | --IINARL-----      |
| Penicillium_chrysogenum       | --IINARI-----      |
| Paracoccidioides_brasiliensis | --IINARL-----      |
| Schizosaccharomyces_pombe     | --IVNVHSL-----     |
| Saccharomyces_cerevisiae      | --IINSRN-----      |
| Kluyveromyces_lactis          | --IINSRV-----      |
| Candida_dublinsiensis         | --IIKSRL-----      |
| Clavispora_lusitaniae         | --IIKSRL-----      |
| Chlamydomonas_reinhardtii     | --ICNAAGPKAK-----  |
| Volvox_carteri                | --ICNSAGPKAK-----  |
| Dictyostelium_fasciculatum    | --IINTANPKSYL----- |
| Entamoeba_histolytica         | --IINSVSEKF-----   |
| Cryptosporidium_parvum        | -KIIESAQ-----      |
| Cryptosporidium_muris         | -EIINCTFH-----     |
| Plasmodium_falciparum         | -DIIKSAM-----      |
| Plasmodium_vivax              | -EIIKSAM-----      |
| Paramecium_tetraurelia        | -DIVAAANDAR-----   |
| Tetrahymena_thermophila       | -DIVAACNIVKH-----  |
| Toxoplasma_gondii             | -DIIASGMKKNE-----  |
| Trypanosoma_brucei            | -DIIKATQ-----      |
| Trypanosoma_cruzi             | -EIIEATK-----      |
| Leishmania_mexicana           | -DIIDATR-----      |
| Leishmania_donovani           | -DIIDATR-----      |
| Giardia_lamblia               | IDILTKTRT-----     |
| Trichomonas_vaginalis         | --IVNSNVHVK-----   |
| Sphingobacterium_sp           | --IVKVFN-----      |
| Pedobacter_saltans            | --IVKTFNN-----     |
| Marivirga_tractuosa           | --IIKSF-----       |
| Cyclobacterium_marinum        | --IAESF-----       |
| Leadbetterella_byssophila     | --ISKSFPA-----     |

|                                |                           |
|--------------------------------|---------------------------|
| Haliscomenobacter_hydrossis    | --IVEATKK-----            |
| Parabacteroides_distasonis     | --IIEAF-----              |
| Bacteroides_fragilis           | --IIDAFN-----             |
| Prevotella_ruminicola          | --IIDAWKK-----            |
| Alistipes_shahii               | --IGKGFSS-----            |
| Porphyromonas_asaccharolytica  | --IITANK-----             |
| Cellulophaga_lytica            | --IIDAI-----              |
| Kordia_algicida                | --IINAI-----              |
| Flavobacterium_psychrophilum   | --IVNGI-----              |
| Neisseria_gonorrhoeae          | --IISAAQNA-----           |
| Francisella_tularensis         | --IINQANKICTE-----        |
| Mycoplasma_genitalium          | --MARVYA-----             |
| Ureaplasma_urealyticum         | --IINACK-----             |
| Ureaplasma_parvum              | --IIDKCK-----             |
| Buchnera_aphidicola            | --IIKIAHEHYS-----         |
| Campylobacter_jejuni           | --LIK-----                |
| Helicobacter_pylori            | --IISFL-----              |
| Orientia_tsutsugamushi         | --IIKTVQGLD-----          |
| Wolbachia_sp                   | --IIQQVEKKFSLINSKISN----- |
| Methanocaldococcus_Jannaschii  | -AIRELIKFI-----           |
| Methanococcus_voltae           | -SIRDLISEL-----           |
| Methanothermococcus_okinawensi | -SIQELIKHI-----           |
| Pyrococcus_Woesei              | -AIWDLVSGI-----           |
| Pyrococcus_furiosus            | -AIWDLVSGIIE-----         |
| Thermofilum_pendens            | -AILDLISPIIK-----         |
| Methanothermobacter_thermautot | -ALLDLVSKV-----           |
| Methanosaeta_thermophila       | -ALEDLVTGV-----           |
| Natronobacterium_gregoryi      | -ALDDLVEPL-----           |
| Halobacterium_salinarum        | -ALADLVAPL-----           |
| Halogeometricum_borinquense    | -ALEDLVEPL-----           |
| Methanosphaerula_palustris     | -VLRDLVSL-----            |
| Thermoproteus_tenax            | -KIVELAKPLSELR-----       |
| Pyrobaculum_islandicum         | -KIFELAKPLTVAAEPP-----    |
| Cenarchaeum_symbiosum          | -AIAELAQAMS-----          |
| Nitrosopumilus_maritimus       | -IISEFAKALV-----          |
| Desulfurococcus_kamchatkensis  | -VMKEMAEAMLKGLA-----      |
| Pyrolobus_fumarii              | -KMRELAEGLAPRR-----       |
| Acidilobus_saccharovorans      | -ALSEFVDALSSVA-----       |
| Sulfolobus_islandicus          | -VVEDFITSALKAISS-----     |
| Clustal Consensus              |                           |
